1 Title

2 **Differential requirements of cyclase associated protein (CAP) for actin turnover during**  
3 **the lytic cycle of *Toxoplasma gondii***

4  
5 Alex Hunt<sup>1</sup>, Jeanette Wagener<sup>1</sup>, Robyn Kent<sup>2</sup>, Romain Carmeille<sup>3</sup>, Matt Russell<sup>4</sup>, Christopher  
6 Peddie<sup>4</sup>, Lucy Collinson<sup>4</sup>, Aoife Heaslip<sup>3</sup>, Gary E. Ward<sup>2</sup> & Moritz Treeck<sup>1\*</sup>

7  
8 <sup>1</sup> Signalling in Apicomplexan Parasites Laboratory, The Francis Crick Institute, United Kingdom

9 <sup>2</sup> Department of Microbiology and Molecular Genetics, University of Vermont Larner College of  
10 Medicine, Burlington, Vermont, United States

11 <sup>3</sup> Department of Molecular and Cell Biology, University of Connecticut, Connecticut, United  
12 States

13 <sup>4</sup> Electron Microscopy Science Technology Platform, The Francis Crick Institute, United  
14 Kingdom

15  
16 \*For correspondence: [moritz.treeck@crick.ac.uk](mailto:moritz.treeck@crick.ac.uk)

17  
18 Abstract

19 *Toxoplasma gondii* contains a limited subset of actin binding proteins. Here we show that  
20 ablation of the putative actin regulator cyclase-associated protein (TgCAP) leads to significant  
21 defects in some but not all actin dependent processes, including a defect in cell-cell  
22 communication, but surprisingly not synchronicity of division. Two CAP isoforms originate from  
23 alternative translational start sites and are beneficial for parasite fitness while a single isoform  
24 is sufficient for virulence in mice. Examination of the mutant parasites by 3D electron  
25 microscopy reveals that loss of CAP results in a defect to form a normal residual body, but all  
26 parasites remain connected within the vacuole. This dissociates synchronicity of division and  
27 parasite rosetting and reveals that establishment and maintenance of the residual body may  
28 be more complex than previously thought. These results highlight the different spatial  
29 requirements for actin turnover in *Toxoplasma*, controlled by a reduced subset of actin binding  
30 proteins.

31  
32 Introduction

33 *Toxoplasma gondii* is an obligate intracellular parasite, belonging to the Apicomplexa phylum.  
34 The Apicomplexa, which also include *Plasmodium* and *Cryptosporidium* species, pose a  
35 significant global public health burden. *Toxoplasma*, specifically, is one of the most prevalent  
36 human pathogens, chronically infecting ~30% of the world's population (Swapna & Parkinson,  
37 2017). While most infections are asymptomatic, in congenitally infected and  
38 immunocompromised patients, disease outcomes are often severe and potentially fatal  
39 (Halonen & Weiss, 2013). During acute infection of the host, the asexual tachyzoite stage of  
40 *Toxoplasma gondii* undergoes cycles of active invasion, replication and egress from host cells.  
41 This lytic cycle leads to rapid proliferation and dissemination of the parasite throughout the  
42 host (Black & Boothroyd, 2000). To facilitate these processes, *Toxoplasma* utilises a unique  
43 form of locomotion, called gliding motility, which relies on actin and an unconventional myosin  
44 motor (Frénal, Dubremetz, et al., 2017). This motor allows the parasite to actively invade host  
45 cells, where it forms a protective parasitophorous vacuole (PV). PV structural integrity and  
46 stability is sustained through the parasite's release of dense granule proteins from secretory  
47 vesicles (Heaslip et al., 2016). Additionally, several dense granule proteins are transported  
48 into the host cell where they co-opt or interfere with host cell functions (Hakimi et al., 2017).  
49 Within the PV, *Toxoplasma* begins a unique form of cell division called endodyogeny (Sheffield  
50 & Melton, 1968). Here, two daughter cells are synchronously assembled within the mother cell  
51 before daughter cell budding (Delbac et al., 2001). This initiates at the apical pole of the mother  
52 cell and once complete, the daughter cells bud from the mother cell but remain attached at  
53 their basal pole to the residual body: a membranous compartment containing maternal  
54 remnants of organelles and cytoskeletal elements (Muñiz-Hernández et al., 2011). During cell  
55 division, organelles such as mitochondria and the apicoplast, a unique and essential organelle

56 which contributes to isoprenoid synthesis (Vaishnava & Striepen, 2006), also divide and are  
57 distributed between the two daughter parasites. Following multiple rounds of cell division,  
58 parasites organise into a rosette-like pattern around the residual body. Formation of the  
59 characteristic rosette pattern requires actin, several myosins, and other actin-binding proteins  
60 (Frénal, Jacot, et al., 2017; Haase et al., 2015; Jacot et al., 2013; Periz et al., 2017; Tosetti et  
61 al., 2019). It has been hypothesised that the inter-parasite connections via the residual body  
62 are not only important for parasite organisation, but also play a key role in cell-cell  
63 communication. Such communication was measured by the transfer of reporter proteins  
64 between parasites and is believed to ensure the synchronous division of parasites within a  
65 vacuole (Frénal, Jacot, et al., 2017). The parasites continue to replicate until host cell lysis and  
66 parasite egress. Following egress, parasites migrate to and invade new host cells and the lytic  
67 cycle repeats, leading to tissue destruction (Black & Boothroyd, 2000). Actin plays an essential  
68 role in the parasite's lytic cycle through function of the actin cytoskeleton and actomyosin motor  
69 complex. Despite this crucial role in apicomplexan biology, there has been difficulty visualising  
70 actin filaments in apicomplexan species (Bannister & Mitchell, 1995; Sahoo et al., 2006; Shaw  
71 & Tilney, 1999) and it has been suggested that as much as 98% of parasite actin is monomeric  
72 (G-actin) and not incorporated into filaments (F-actin) (Dobrowolski et al., 1997). This, along  
73 with structural differences found in actin of Apicomplexa (Pospich et al., 2017), led to the  
74 hypothesis that *Toxoplasma* F-actin has reduced stability, forming abnormally short filaments  
75 that are rapidly recycled to maintain essential cellular function (Pospich et al., 2017; Skillman  
76 et al., 2011). However, recent development of the actin-chromobody has allowed for the  
77 visualisation of long F-actin structures both in the parasite and extensive networks within the  
78 PV (Periz et al., 2017). Taken together, along with biochemical evidence, apicomplexan actin  
79 appears to be different to actin from other organisms (Frénal, Dubremetz, et al., 2017).

80  
81 Actin turnover is regulated by actin binding proteins, of which *Toxoplasma* possesses a  
82 reduced repertoire, including ADF/cofilin, profilin, coronin and cyclase-associated protein  
83 (CAP) (Baum et al., 2006). Functional studies have shown ADF/cofilin and profilin to be  
84 essential for *Toxoplasma* progression through the lytic cycle, while coronin depletion had a  
85 modest impact on parasite invasion and egress (Mehta & Sibley, 2011; Plattner et al., 2008;  
86 Salamun et al., 2014). Apart from its localisation, the function of CAP in *Toxoplasma* has not  
87 been investigated. In the majority of eukaryotes, CAP is a highly conserved multidomain  
88 protein that regulates actin filament dynamics via two distinct mechanisms (Ono, 2013). CAP  
89 can bind and sequester G-actin using its CAP and X-linked retinitis pigmentosa 2 protein  
90 (CARP) domain and can regulate actin filament disassembly by promoting ADF/cofilin  
91 mediated severing using its helical folded domain (HFD). Through regulation of actin dynamics,  
92 by interacting with actin and other actin binding proteins, it has been shown that mouse CAP1  
93 plays important roles in cell morphology, migration and endocytosis (Bertling et al., 2004).  
94 However, species belonging to the Apicomplexa phylum possess a truncated form of CAP,  
95 retaining only the conserved C-terminal G-actin-binding CARP domain (Hliscs et al., 2010).  
96 This conserved  $\beta$ -sheet domain has been shown to interact directly with monomeric actin,  
97 providing either sequestration or nucleotide exchange of G-actin in a concentration-dependent  
98 manner (Hliscs et al., 2010; Makkonen et al., 2013; Mattila et al., 2004). As such, apicomplexan  
99 CAP is hypothesised to regulate actin turnover solely through interaction with monomeric actin.  
100 Biochemical analysis of *Cryptosporidium parvum* CAP identified the formation of a dimer and  
101 G-actin sequestering activity, while *Plasmodium falciparum* CAP was shown to facilitate  
102 nucleotide exchange, loading ADP-actin monomers with ATP (Hliscs et al., 2010; Makkonen  
103 et al., 2013). A *Plasmodium berghei* CAP KO demonstrated that while PbCAP is dispensable  
104 for asexual blood stages *in vivo*, there is a complete defect in oocyst development in the insect  
105 vector which was overcome through complementation with *C. parvum* CAP (Hliscs et al.,  
106 2010). A PbCAP overexpression study revealed no defect in ookinete motility or oocyst  
107 development, however sporozoites displayed impaired gliding motility, invasion and salivary  
108 gland colonisation (Sato et al., 2016). Taken together, these results suggest that apicomplexan  
109 CAP may function as a dimer with the ability to interact with G-actin monomers to sequester  
110 them and/or facilitate their nucleotide exchange. While CAP has yet to be functionally

111 characterised in *Toxoplasma*, Lorestani *et al* reported that CAP localises to the apex of  
112 intracellular parasites, a hub for events leading to egress and motility (Graindorge *et al.*, 2016;  
113 Lorestani *et al.*, 2012; Tosetti *et al.*, 2019). Intriguingly, following host cell lysis, relocalisation  
114 of CAP to the parasite cytosol was observed (Lorestani *et al.*, 2012). Furthermore, we have  
115 previously identified differential phosphorylation of TgCAP in parasites with a delayed egress  
116 phenotype (Treeck *et al.*, 2014). The correlation between TgCAP redistribution and  
117 phosphorylation, following host cell lysis, hints at a potential role for TgCAP in actin regulation  
118 during rapid egress. Taken together, these results prompted us to characterise the role of  
119 TgCAP in *Toxoplasma* biology.

120

121 Here we show that TgCAP is produced in two distinctly localised isoforms through alternative  
122 translation initiation: a membrane bound isoform, localised to the apical tip (longCAP) and a  
123 cytosolically dispersed isoform (shortCAP). Conditional knockout of TgCAP, using a second  
124 generation DiCre strain, identified an important function of TgCAP in some, but not all, actin-  
125 dependent processes. Invasion, egress, motility, correct daughter cell orientation and dense  
126 granule trafficking were all perturbed in CAP depleted parasites, while apicoplast inheritance  
127 was not. This suggests different spatial requirements for CAP in actin turnover within the cell.  
128 Furthermore, the characteristic rosette organisation of parasites in the vacuole was completely  
129 lost, but synchronicity of division was unaffected. Strikingly, while we observe rapid protein  
130 transfer only between two adjacent cells in a vacuole, all parasites remain connected through  
131 a decentralised residual body, potentially explaining why synchrony of division is unaffected.  
132 In the mouse *in vivo* infection model, CAP-depleted type I RH parasites display normal lethality,  
133 while CAP depletion renders type II Pru parasites avirulent, with markedly reduced cyst  
134 formation. Furthermore, the cytoplasmic isoform of TgCAP was sufficient for the infection of  
135 mice and the formation of latent stages in the brain, indicating that the apically localised CAP  
136 isoform provides only a small fitness benefit under the conditions tested here.

137

## 138 Results

### 139 **TgCAP contains two translational start sites which results in the production of two** 140 **differentially localised protein isoforms.**

141 TgCAP was previously shown to localise to the apex of intracellular parasites and rapidly  
142 redistribute to the cytoplasm of extracellular parasites following host cell lysis (Lorestani *et al.*,  
143 2012). This suggested that TgCAP localisation may be influenced by post-translational  
144 modifications that enable CAP to regulate actin dynamics at different locations in the cell.  
145 TgCAP, and CAP from *Neospora* and *Hammondia* species contain a unique predicted N-  
146 terminal extension that is not present in other Apicomplexa, such as *Plasmodium* (Fig 1A). The  
147 extension contains two predicted palmitoylation sites and CAP was identified in an analysis of  
148 palmitoylated proteins in *Toxoplasma gondii* (Foe *et al.*, 2015). Furthermore, two  
149 phosphorylation sites in the N-terminus of TgCAP are substantially phosphorylated upon  
150 ionophore-induced egress (Treeck *et al.*, 2014). These phosphorylation events are dependent  
151 on the calcium-dependent kinase 3 (TgCDPK3) (Treeck *et al.*, 2014), which has been shown  
152 to be important in mediating rapid exit from the host cell and is localised to the plasma  
153 membrane (Black *et al.*, 2000; Garrison *et al.*, 2012; Lourido *et al.*, 2012; McCoy *et al.*, 2012).  
154 Collectively, these observations allow for the possibility that re-localisation of CAP is important  
155 for egress and is mediated by dynamic post-translational modifications. To visualise TgCAP  
156 we expressed it as a GFP fusion. TgCAP-GFP localises to the apex of the parasite, as  
157 previously shown, but also to the cytoplasm of intracellular tachyzoites (Fig. 1B). We  
158 additionally demonstrated this dual localisation of TgCAP by C-terminally tagging the  
159 endogenous TgCAP locus with a HA epitope tag (Supplementary Fig. 1). To rule out any mis-  
160 localisation of the protein as a result of tagging, we expressed recombinant TgCAP, spanning  
161 residues 37 to 203, and generated antibodies against TgCAP which confirmed the dual  
162 localisation (Fig 1C). Western blot analysis of parasite lysates revealed the presence of two  
163 bands close to the expected size of TgCAP, which are expressed at a constant level, relative  
164 to the *Toxoplasma* loading control, across the first 24 hours following host cell invasion (Fig.  
165 1D). The dual localisation of CAP could be due to the expression of two isoforms from a single

166 gene, through use of alternate translational start sites, as previously observed for protein  
167 kinase G (Brown et al., 2017). Indeed, sequence comparison of TgCAP to PfCAP reveals a  
168 second in-frame methionine at position 37 in *Toxoplasma* that aligns with the PfCAP start  
169 methionine (Fig. 1A). Two additional methionine residues, M71 and M161, are present in the  
170 CAP primary sequence. However, these are unlikely used as translational start sites as their  
171 products would lead to a truncated and potentially inactive CARP domain.

172  
173 Translational start sites in eukaryotic mRNAs are preceded by a translation initiation sequence  
174 (Kozak, 1987a, 1987b). Consensus translation initiation sequences have been determined for  
175 many different organisms and are known as the Kozak sequence (Nakagawa et al., 2008). In  
176 *Toxoplasma*, the Kozak sequence was elucidated by identifying nucleotides commonly found  
177 in highly abundant proteins, such as SAG1 (Seeber, 1997). This Kozak sequence contains an  
178 adenine at the -3 position, relative to the start ATG, and was identified as the most important  
179 factor in ribosomal recognition of the start ATG (Seeber, 1997). Absence of an adenine can  
180 result in ribosome “leaky scanning” and translation from an internal ATG. We therefore  
181 analysed the translation initiation sequence around CAP’s first (M1) and second (M37) putative  
182 translational start sites. The M1 translation initiation sequence conforms less with  
183 the *Toxoplasma* Kozak sequence than the sequence preceding M37; as the former is  
184 lacking an adenine at the -3 position (Fig. 1E). This suggested that alternative translation could  
185 lead to the generation of two CAP isoforms: longCAP, which is translated from the first start  
186 ATG, and shortCAP, which is translated from the second start ATG. To test this, we generated  
187 parasite strains that expressed either the WT sequence or variants where either the first (M1),  
188 or the second methionine (M37) of TgCAP was mutated to leucine, precluding their use as  
189 translational start sites (Fig. 1F). We used the endogenous promoter (i.e. 969 bp upstream of  
190 the first start ATG) and introduced the C-terminal HA-tagged TgCAP variants into the *UPRT*  
191 locus of the RH DiCre $\Delta ku80\Delta hxp$  parasite strain. To determine whether longCAP and  
192 shortCAP show differential localisation, as predicted by the presence of putative palmitoylation  
193 sites in longCAP, we analysed their subcellular localisation using the HA-tag. While WT CAP  
194 parasites showed the expected dual localisation, mutants expressing shortCAP showed  
195 exclusively cytoplasmic staining while those expressing longCAP showed predominantly apical  
196 staining, with some further signal throughout the parasite (Fig. 1G). As longCAP contains two  
197 putative palmitoylation sites not present in the shortCAP sequence, we next evaluated whether  
198 palmitoylation was important for the apical localisation of the long CAP isoform. We mutated  
199 the two cysteines in the N-terminus to alanine residues (CAP\_C6,8A). CAP\_C6,8A appeared  
200 cytosolic with no detectable accumulation of CAP at the apical end of the parasites (Fig. 1G).  
201 Western blot analysis of the HA-tagged TgCAP variants confirmed that WT CAP is identified  
202 as two distinct protein bands, which correlate with the predicted size for longCAP and  
203 shortCAP (23.9 and 20 kDa). Parasites expressing shortCAP displayed only the lower  
204 molecular weight band, while longCAP-expressing parasites only showed the higher molecular  
205 weight band. We observed that the protein levels of longCAP appear reduced compared to its  
206 isoform in parasites expressing WT CAP, whereas the shortCAP isoform shows an increase  
207 (Fig. 1H). As expected, despite CAP\_C6,8A not being detected at the apical end of the  
208 parasite, both isoforms were detected by Western blot at levels comparable to parasites  
209 expressing WT CAP. Collectively, these results show that in *Toxoplasma*, and potentially  
210 closely related coccidian parasites of *Hammondia* and *Neospora*, CAP is produced as two  
211 differentially localised isoforms using alternative translational start sites and the apical  
212 localisation of the long isoform is likely palmitoylation dependent.

#### 213 214 **Generation of a more stable RH DiCre $\Delta ku80$ cell line**

215 While attempting to generate a conditional knock out (cKO) of CAP using the DiCre strategy,  
216 we observed a frequent loss of one of the DiCre subunits, resulting in dysfunctional floxed CAP  
217 parasite strains that lacked the ability to excise CAP. This is possibly because both DiCre  
218 subunits are driven by identical 5’ and 3’ UTRs, allowing for potential recombination in the  
219  $\Delta ku80$  parental line, which possesses an increased efficiency of homologous recombination  
220 (Fox et al., 2009; Huynh & Carruthers, 2009). To prevent loss of DiCre subunits, we generated

221 a new DiCre construct, DiCre\_T2A, that expresses the two DiCre subunits from a single  
222 promotor using T2A skip peptides (Kim et al., 2011). To further minimise the potential for loss  
223 of DiCre, we placed a chloramphenicol acetyltransferase (CAT) selectable marker between  
224 the two subunits (Fig. 2A). This would lead to the production of the two separate Cre subunits  
225 and the CAT selectable marker. We inserted this construct, into the modified *KU80* locus of  
226 the RH  $\Delta ku80\Delta hxgprt$  strain (Huynh & Carruthers, 2009) using CRISPR/Cas9. To test whether  
227 expression of the DiCre subunits in the resulting line, RH DiCre\_T2A  $\Delta ku80\Delta hxgprt$ , is stable  
228 over time, we integrated the loxP-KillerRed-loxP-YFP reporter construct used in Andenmatten  
229 *et al.*, into the *UPRT* locus (Andenmatten et al., 2013). As expected, non-treated parasites  
230 express KillerRed which, upon RAP treatment, is excised and leads to expression of YFP (Fig.  
231 2B). As extracellular stress can lead to increased loss of DiCre activity in the original DiCre  
232 line (M. Meissner, personal communication, 02.2019), we subjected the new DiCre parasite  
233 line (RH DiCre\_T2A  $\Delta ku80\Delta hxgprt$ ) to frequent extracellular stress over the course of 65 days.  
234 On average, parasites were passaged every 2.3 days, leaving parasites extracellular for ~32  
235 hours in the presence or absence of continuous chloramphenicol selection. We also  
236 simultaneously passaged the original DiCre line (Andenmatten et al., 2013) under standard,  
237 non-stressing, culturing conditions. The new DiCre\_T2A line excision efficiency varied  
238 between 98 and 99% for replicates on day 1 and was maintained throughout the experiment  
239 with a maximal loss of 3% of excision efficiency, irrespective of the presence or absence of  
240 chloramphenicol selection, by day 65 (Fig. 2C). In contrast, the original DiCre line, cultured  
241 under standard non-stress conditions, lost 42% of excision capacity by day 65 (Supplementary  
242 Fig. 2), although this was only done as a single replicate. This shows that the second  
243 generation DiCre line, RH DiCre\_T2A  $\Delta ku80\Delta hxgprt$ , retains high excision capacity over long  
244 periods of time, even when exposed to extracellular stress.

245

246 **TgCAP is important but not essential for *in vitro* growth and deletion can be largely**  
247 **restored by the short cytoplasmic isoform, but only partially by the membrane bound**  
248 **isoform.**

249 To investigate CAP function, we generated a conditional knock out (cKO) of *CAP* using the  
250 DiCre strategy. Here, *CAP* with a C-terminal HA tag is flanked by two loxP sites, that recombine  
251 upon dimerisation of two split-Cre subunits, a process mediated by the small molecule  
252 rapamycin (RAP) (Andenmatten et al., 2013). To create the *CAP* conditional knockout line, we  
253 integrated a floxed, recodonised and HA-tagged CAP cDNA sequence into the endogenous  
254 locus of the RH DiCre  $\Delta ku80\Delta hxgprt$  line (Fig. 3A). Correct integration into the locus was  
255 confirmed by PCR (Fig. 3B). However, due to the DiCre issues detailed above, we were not  
256 able to successfully induce DiCre-mediated excision of the *CAP* gene. As the DiCre\_T2A  
257 strategy demonstrated consistently high excision rates over time, during our testing with a  
258 reporter construct, we integrated the DiCre\_T2A construct into the *KU80* locus of the non-  
259 excising floxed *CAP* parasite strain. This generated the parasite line RH DiCre\_T2A  
260 DiCre  $\Delta ku80\Delta hxgprt$  *LoxPCAP-HA*, called LoxPCAP hereafter. As expected, LoxPCAP  
261 displayed dual localisation by IFA (Fig. 3C). RAP treatment resulted in a complete loss of CAP  
262 ( $\Delta$ CAP), as shown by IFA (Fig. 3C) and Western blot (Fig. 3D).

263

264 To assess the requirements of CAP and its isoforms for various *Toxoplasma* functions, we  
265 complemented LoxPCAP parasites with either wildtype, the short or the long CAP isoform by  
266 integration of HA-tagged variants into the *UPRT* locus to generate merodiploid lines (named  
267 LoxPCAP<sup>CAP</sup>, LoxPCAP<sup>shortCAP</sup> and LoxPCAP<sup>longCAP</sup>, respectively). We then excised the  
268 endogenous CAP copy by RAP treatment. Clones were subsequently obtained by limiting  
269 dilution and excision verified by PCR (Supplementary Fig. 3).

270

271 This resulted in parasite strains that express only the WT complemented form ( $\Delta$ CAP<sup>CAP</sup>), the  
272 short complemented form ( $\Delta$ CAP<sup>shortCAP</sup>) or the long complemented form ( $\Delta$ CAP<sup>longCAP</sup>). We  
273 confirmed the differential localisation and translation of these isoforms by IFA (Fig. 3E) and  
274 Western blot (Fig. 3F). No differences in the protein levels of the two CAP isoforms could be

275 observed in the CAP complemented strain ( $\Delta\text{CAP}^{\text{CAP}}$ ) over the first 24 hours following host cell  
276 invasion, relative to the loading control (Supplementary Fig. 4).

277  
278 To reliably quantify the contribution of CAP, and its two isoforms independently, to the lytic  
279 cycle, we performed a competition assay in which growth of  $\Delta\text{CAP}^{\text{CAP}}$  was compared to  $\Delta\text{CAP}$ ,  
280  $\Delta\text{CAP}^{\text{shortCAP}}$  and  $\Delta\text{CAP}^{\text{longCAP}}$ . To do so, we integrated an mCherry expressing cassette into  
281 the  $\Delta ku80$  locus, replacing the DiCre\_T2A cassette in each of these lines. Note, the DiCre\_T2A  
282 cassette was no longer required because CAP had already been excised in these parasites.  
283 After 15 days in growth competition with  $\Delta\text{CAP}^{\text{CAP}}$ ,  $\Delta\text{CAP}$  parasites were largely depleted  
284 (>97.3%) from the population, while  $\Delta\text{CAP}^{\text{shortCAP}}$  showed a reduction of only 4%. In contrast,  
285  $\Delta\text{CAP}^{\text{longCAP}}$  showed an intermediate level of depletion (33.3%). These phenotypes were  
286 exaggerated after 30 days in culture;  $\Delta\text{CAP}$  parasites were largely depleted (>99.9%),  
287  $\Delta\text{CAP}^{\text{shortCAP}}$  showed a reduction of 12.4%, and  $\Delta\text{CAP}^{\text{longCAP}}$  growth was reduced by 43.1%  
288 relative to  $\Delta\text{CAP}^{\text{CAP}}$  (Fig. 4A). Collectively, these findings demonstrate that CAP plays an  
289 important but non-essential role in cell culture and that its function can be largely restored by  
290 the short CAP isoform but only partially by the long isoform.

291

### 292 **TgCAP contributes to motility, invasion, egress and dense granule trafficking**

293 While the competition assays highlight the importance of CAP during the *in vitro* lytic cycle,  
294 they do not clarify which step of the cycle is affected. To test whether the growth differences  
295 between the lines were merely a result of differences in parasite replication rates, we counted  
296 the parasites per vacuole for each parasite line. No significant differences were observed  
297 (Supplementary Fig. 5). As CAP is a predicted actin regulator, we next focused our phenotypic  
298 analysis on *Toxoplasma* processes for which actin is known to be important, such as motility,  
299 egress, invasion and dense granule trafficking (Heaslip et al., 2016; Periz et al., 2017; Whitelaw  
300 et al., 2017).

301

302 In the absence of CAP ( $\Delta\text{CAP}$ ) significantly fewer parasites are able to initiate gliding motility  
303 in 3D motility assays (Leung et al., 2014) compared to the RH strain (Fig. 4B). In the motile  
304 population, trajectory displacement, trajectory length and maximum achieved speeds were all  
305 significantly reduced, although mean speed was not significantly different (Fig. 4B). To  
306 determine which isoform(s) contribute to parasite 3D motility, the motility parameters of  
307  $\Delta\text{CAP}^{\text{CAP}}$ ,  $\Delta\text{CAP}^{\text{shortCAP}}$  and  $\Delta\text{CAP}^{\text{longCAP}}$  were compared. Both  $\Delta\text{CAP}^{\text{shortCAP}}$  and  $\Delta\text{CAP}^{\text{longCAP}}$   
308 parasites showed similar levels of motility initiation, track displacement, track lengths and  
309 speed compared to  $\Delta\text{CAP}^{\text{CAP}}$  (Supplementary Fig. 6). These data indicate that CAP plays a  
310 role in initiation of motility and in controlling speed and track length once motile.  
311 Complementation with single isoforms shows that initiation of motility can be rescued by either  
312 CAP isoform and, once motile, either can maintain speed and track length.

313

314 As invasion and egress of host cells rely on active motility, we next compared invasion  
315 efficiency of  $\Delta\text{CAP}$  and the different complementation lines.  $\Delta\text{CAP}$  showed a significant  
316 reduction of invasion capacity (50.2% reduction compared to WT complemented lines), which  
317 was restored by both the short and long isoforms (Fig. 4C). We also performed egress assays  
318 in the presence of BIPPO, which results in a strong calcium response in *Toxoplasma* parasites  
319 causing synchronised and rapid egress from host cells (Howard et al., 2015).  $\Delta\text{CAP}$  parasites  
320 showed a substantial delay in egress from host cells at 30 s after induction (73.1% less egress  
321 in  $\Delta\text{CAP}$  compared to  $\Delta\text{CAP}^{\text{CAP}}$ ), while at 2 minutes the majority of parasites have egressed  
322 (10.6% less egress in  $\Delta\text{CAP}$  compared to  $\Delta\text{CAP}^{\text{CAP}}$ ) (Fig. 4D). This defect was fully restored  
323 in  $\Delta\text{CAP}^{\text{shortCAP}}$  parasites, while  $\Delta\text{CAP}^{\text{longCAP}}$  showed slightly lower levels of egress after 30 s of  
324 treatment but by 60 s were indistinguishable from WT or short CAP complemented lines. We  
325 also observed live egress events in which  $\Delta\text{CAP}$ , following host cell egress, showed decreased  
326 movement away from the host cell when compared to  $\Delta\text{CAP}^{\text{CAP}}$ ,  $\Delta\text{CAP}^{\text{shortCAP}}$  and  $\Delta\text{CAP}^{\text{longCAP}}$   
327 (Videos 1-4).

328

329 A recent study revealed that directed dense granule transport is dependent on filamentous  
330 actin (Heaslip et al., 2016). Therefore, dense granule trafficking was assessed in  $\Delta$ CAP and  
331 the three complemented lines. We measured the run frequency (# of directed  
332 runs/parasite/minute), run length and velocity of directed motions. (Fig. 4E). Both the mean  
333 run length and the mean velocity were significantly increased in  $\Delta$ CAP (34.8% and 52.9%,  
334 respectively), but not in either of the complements. However, the frequency of directed runs  
335 was reduced in  $\Delta$ CAP (14.8%), but did not reach significance. These results indicate that both  
336 CAP isoforms play a supporting role in dense granule trafficking and that, upon CAP deletion,  
337 dense granules are trafficked further distances at higher speed. Collectively these data show  
338 that CAP plays a role in the actin-dependent processes described above and that either  
339 isoform is able to fulfil these CAP functions.

340

#### 341 **$\Delta$ CAP parasites display a defect in efficient cell-cell communication**

342 Actin, formin 3 and myosin I and J have been shown to be important for both parasite rosette  
343 organisation and cell-cell communication, as assessed by measuring the rapid transfer of  
344 reporter proteins between individual parasites in a vacuole (Fréna1, Jacot, et al., 2017; Periz  
345 et al., 2017; Tosetti et al., 2019). Upon CAP deletion, we observed a complete loss of the  
346 characteristic rosette formation normally seen in *Toxoplasma*. This aberrant phenotype was  
347 fully rescued upon complementation with either WT CAP or the short CAP isoform (Fig. 5A).  
348  $\Delta$ CAP<sup>longCAP</sup> displayed partial restoration with 44.9% of parasites forming phenotypically normal  
349 rosettes while the remainder were disorganised within the vacuole. This was also shown by  
350 scanning electron images of infected human fibroblasts in which the host cell and the vacuole  
351 membrane was removed (“unroofed”) as previously described (Magno et al., 2005)  
352 (Supplementary Fig. 7).

353

354 It was previously shown that mutant parasite lines which lost rosetting capacity also lost the  
355 rapid transfer of reporter proteins (called RTORP hereafter) between them. This has been  
356 established by photobleaching of individual parasites in a vacuole, which express a fluorescent  
357 reporter protein. Under normal conditions, all parasites in a vacuole contribute to the  
358 fluorescence recovery of the photobleached parasite (Fréna1, Jacot, et al., 2017; Periz et al.,  
359 2017; Foe et al., 2018; Tosetti et al., 2019). Such transfer of reporter proteins has previously  
360 been used as a readout for cell-cell communication and, by extension, parasite connectivity  
361 (Fréna1, Jacot, et al., 2017; Periz et al., 2017). To examine whether loss of cell-cell  
362 communication also accompanied the disrupted rosetting observed in  $\Delta$ CAP parasites, we  
363 performed fluorescence recovery after photobleaching (FRAP) experiments on  $\Delta$ CAP and its  
364 complementation lines. We chose vacuoles that contained 8 parasites/ vacuole as at this stage  
365 parasites organise in rosettes and individual cells can be easily monitored. We bleached one  
366 parasite in the vacuole and recorded both the recovery of fluorescence in the bleached parasite  
367 and the fluorescence levels of all other parasites in the vacuole. As expected, the WT-  
368 complemented  $\Delta$ CAP<sup>CAP</sup> photobleached parasites display rapid recovery of fluorescence to  
369 which, in most cases, all parasites in the vacuole appear to contribute (Fig. 5Bi, 5C and Video  
370 5). Conversely,  $\Delta$ CAP photobleached parasites were supported in their rapid fluorescence  
371 recovery predominantly by just one other parasite, usually the parasite closest to the bleached  
372 cell, resulting in slow recovery (Fig. 5Bii, 5C and Video 6). In some cases, no recovery was  
373 observed in  $\Delta$ CAP parasites.

374

375 Loss of rapid protein transfer between parasites could be explained by a structural disruption  
376 of inter-parasite connections provided by the residual body. However, in addition to the residual  
377 body, an intravacuolar network (IVN) of tubule-like structures is present in the parasitophorous  
378 vacuole. Because of its tubular structure, it could also be involved in cell-cell communication.  
379 To determine whether the observed defect in the RTORP was dependent on the presence of  
380 the IVN, we performed a FRAP assay in RH  $\Delta$ ku80 $\Delta$ gra2 parasites (Rommereim et al., 2016)  
381 where the IVN fails to form but parasites still organise in rosettes. The results show that  
382 RTORP between parasites was not negatively affected (Fig. 5Biii and Video 7). The IVN,  
383 therefore, is unlikely involved in cell-cell communication.

384

385 To test if CAP deletion leads to a defect in cell-cell communication directly, or whether this is  
386 a direct consequence of the inability to form rosettes, we tested whether the RTORP varied  
387 between rosetting (r) and non-rosetting parasites (nr) of the  $\Delta\text{CAP}^{\text{longCAP}}$  line. These  
388 experiments revealed that if  $\Delta\text{CAP}^{\text{longCAP}}$  parasites rosette, they show normal RTORP between  
389 all cells in the vacuole, while non-rosetting parasites display the same defect as the  $\Delta\text{CAP}$  line,  
390 with fluorescence recovery from only one other parasite in the vacuole (Fig. 5C). Interestingly,  
391  $\Delta\text{gra2}$  vacuoles showed a slight increase in the frequency of photobleach recovery from  
392 multiple parasites, but we have not further investigated this phenomenon here. The  
393 connectivity of parasites was also assessed based on the percentage of recovery after  
394 photobleaching. As expected,  $\Delta\text{CAP}$  and non-rosetting  $\Delta\text{CAP}^{\text{longCAP}}$  photobleached parasites  
395 recovered significantly less fluorescence than their rosetting counterparts (Fig. 5D).

396

397 Next, we sequentially photobleached individual  $\Delta\text{CAP}$  parasites in a vacuole and identified  
398 which parasites appear to be physically connected based on the transfer of mCherry (Fig. 5E).  
399 This revealed that only parasite pairs in close proximity are rapidly communicating. Collectively  
400 the results show that CAP deletion leads to a loss of both rosetting and the rapid transfer of  
401 reporter proteins between more than two parasites. Furthermore, RTORP appears to be  
402 dependent on parasite rosette organisation, but not on presence of the IVN.

403

#### 404 **$\Delta\text{CAP}$ parasites have a defect in daughter cell orientation but not in synchronised**

#### 405 **division or apicoplast inheritance**

406 Previously, cell-cell communication has been hypothesised to control synchronous division  
407 between parasites within the same vacuole (Frénal, Jacot, et al., 2017). To determine whether  
408  $\Delta\text{CAP}$  parasites display phenotypes previously observed for mutants with defective cell-cell  
409 communication, we used IMC3 antibodies to visualise synchronicity of forming daughter cells  
410 (Fig. 6A). Surprisingly,  $\Delta\text{CAP}$  vacuoles exhibited synchronous division with no significant  
411 difference to the WT complemented line (Fig. 6B). IMC3 staining was also used to assess  
412 daughter cell orientation. While in WT CAP complemented parasites 94.6% of daughter cells  
413 grew in the same orientation, a significant defect was observed in  $\Delta\text{CAP}$  and  $\Delta\text{CAP}^{\text{longCAP}}$   
414 strains; only 42.9% ( $\Delta\text{CAP}$ ) and 67.7% ( $\Delta\text{CAP}^{\text{longCAP}}$ ) of daughter cells orientated in the same  
415 direction.  $\Delta\text{CAP}^{\text{shortCAP}}$  parasites were able to largely overcome this defect, with 89.5% of  
416 daughter cells growing in the same orientation (Fig. 6C). Such improper orientation of daughter  
417 cells following budding raises the possibility of improper organelle segregation too. To test this,  
418 we looked at apicoplast segregation, another actin-dependent process (Andenmatten et al.,  
419 2013; Jacot et al., 2013). Using streptavidin as a marker for the apicoplast, we identified no  
420 significant differences in apicoplast inheritance rates between  $\Delta\text{CAP}^{\text{CAP}}$  and  $\Delta\text{CAP}$  strains  
421 (Supplementary Fig. 8). These data show that despite a loss of rosette organisation and  
422 RTORP between parasites in a  $\Delta\text{CAP}$  vacuole, as well as disordered daughter cell orientation,  
423 parasite division remains synchronous. Furthermore, while CAP is supporting many actin-  
424 dependent processes in *Toxoplasma*, it appears dispensable for apicoplast division.

425

#### 426 **CAP deletion leads to the formation of a decentralised residual body in which all**

#### 427 **parasites remain connected, despite loss of RTORP**

428 The observed synchronicity of division in the  $\Delta\text{CAP}$  strain, despite loss of RTORP, was  
429 unexpected. It suggested that synchronicity is either independent of the residual body, or that  
430  $\Delta\text{CAP}$  parasites actually maintain connections that allow flow of proteins or metabolites to  
431 synchronise divisions. To investigate this, we established a connectivity map of parasites in a  
432 vacuole using correlative light and electron microscopy (CLEM). This allowed us to first analyse  
433 connectivity of parasites based on FRAP analysis, and then reconstruct a 3D electron  
434 microscopy image of the parasites and their connections by focused ion beam scanning  
435 electron microscopy (FIB SEM).

436

437 In the  $\Delta\text{CAP}^{\text{CAP}}$  strain, as expected for a WT complemented line, all parasites in the vacuole  
438 contribute to recovery of a photobleached parasite (Fig. 7A) and a normal residual body is



439 formed, connecting all parasites in the vacuole (Fig. 7B and Video 8), with one tubular  
440 extension extending away from the residual body with no apparent connections at the distal  
441 end. In contrast, for the  $\Delta$ CAP strain, fluorescence recovery of the photobleached parasite was  
442 predominantly observed from those cells in close proximity (Fig. 7C). To investigate how these  
443 parasites are connected, we analysed FIB SEM images obtained from the photobleached  
444 vacuole in Fig. 7C. This revealed membrane bound tubular connections of approximately 300  
445 nm thickness between parasites, despite the aberrant transfer of mCherry and loss of rosetting  
446 (Fig. 7Di and ii). Following the lumen of the connections across 3 dimensions demonstrates  
447 that all parasites in the vacuole are connected by these tubular connections, likely representing  
448 a decentralised residual body that forms as a result of an inability to keep the posterior ends  
449 of the parasites in close proximity (Fig. 7D.iii, Supplementary Fig. 9 and Video 9). Correlation  
450 of the FRAP data with the FIB SEM images showed that rapid transfer of mCherry was always  
451 between parasites in close proximity at their basal ends.

452  
453 While  $\Delta$ CAP parasites appear to be connected via a decentralised residual body, it could be  
454 that transfer of material through these connections is limited by physical barriers, such as the  
455 mitochondria which have previously been observed in the residual body (Frénal, Jacot, et al.,  
456 2017). Close examination of the residual body connections showed only one such connection  
457 contained two mitochondria and a constriction of the decentralised residual body lumen to ~50  
458 nm, while all other connections appeared free of large physical barriers, indicating that this is  
459 unlikely an explanation for the lack of RTORP between parasites. However, we observed a  
460 complex network of tubules and sheet-like structures, likely representing the endoplasmic  
461 reticulum, in the connections (Fig. 7E) (Puhka et al., 2012; Schroeder et al., 2019; Tomavo et  
462 al., 2013; West et al., 2011). One of these tubular structures, tracked in three dimensions, was  
463 shown to enter multiple parasites via the basal pole, suggesting a possible continuum between  
464 them, which was also observed in then WT CAP complemented parasites. This has not been  
465 further examined here but could contribute to exchange of material between parasites.

466  
467 Collectively, while CAP is important for rosette organisation of parasites, it is not essential for  
468 forming and sustaining a residual body with connectivity to all parasites in the vacuole.  
469 Furthermore, it shows that the RTORP is not an indicator of parasite connectivity.

#### 471 **Deletion of CAP results in completely avirulent type II parasites, but not in the type I RH** 472 **strain.**

473 The short CAP isoform complements most phenotypes in cell culture while the long CAP  
474 isoform, in most cases, only shows a partial rescue. This raises the question about the  
475 evolutionary roles of the two different isoforms. To better discriminate the functions of the short  
476 and longCAP isoforms, we wanted to examine their respective roles in natural infections, where  
477 parasites encounter a number of additional stresses, including shear stress and the immune  
478 system. Accordingly, we addressed the essentiality of CAP and its isoforms in mouse  
479 infections. We hypothesised that if both isoforms are essential for parasite survival in a natural  
480 host, loss of either of the two isoforms would manifest in a fitness cost. First, we injected male  
481 C57BL/6 mice with ~25  $\Delta$ CAP or  $\Delta$ CAP<sup>CAP</sup> tachyzoites of the virulent RH strain, and monitored  
482 them over the course of 10 days. In both instances mice began to succumb to infection after 9  
483 days, indicating that, despite the motility and rosetting phenotypes, CAP depletion in a type I  
484 RH background still results in high virulence in mice (Fig. 8A). As RH parasites have frequently  
485 been associated with hypervirulence and do not form cysts *in vivo*, we next generated  $\Delta$ CAP  
486 parasites and complemented versions in the type II Pru strain. In stark contrast to the RH line,  
487 upon injection of ~50,000 tachyzoites, Pru  $\Delta$ CAP parasites showed no virulence in mice while  
488 the Pru  $\Delta$ CAP<sup>CAP</sup>, Pru  $\Delta$ CAP<sup>shortCAP</sup>, and Pru  $\Delta$ CAP<sup>longCAP</sup> complemented parasites led to a lethal  
489 infection, with most mice succumbing to the parasites 8-10 days post-infection (Fig. 8B). These  
490 data show that expression of either individual isoform is sufficient to cause a lethal infection.  
491 Next, to look at formation of tissue cysts, which leads to a chronic infection, we injected a lower  
492 dose of ~5,000 tachyzoites of the Pru lines into mice. The majority of mice survived until day  
493 32 post-infection, although 2  $\Delta$ CAP<sup>CAP</sup>-infected mice and 1  $\Delta$ CAP<sup>shortCAP</sup>-infected mouse died

494 before reaching this end-point. At day 32, the mice were sacrificed, brain samples were  
495 collected and serum tested for anti-*Toxoplasma* antibodies, confirming that all mice were  
496 successfully infected with *Toxoplasma* (Fig. 8C). Both the Pru  $\Delta$ CAP and Pru  $\Delta$ CAP<sup>longCAP</sup>  
497 infections demonstrated significantly lower cyst loads compared to Pru  $\Delta$ CAP<sup>CAP</sup> and Pru  
498  $\Delta$ CAP<sup>shortCAP</sup> infected mice (Fig. 8D). These results show that CAP plays an essential role in  
499 the virulence of the type II Pru parasite strain, but not the type I RH strain. Moreover, while the  
500 short CAP isoform is able to fulfil all functions of TgCAP in cell culture and in the mouse model,  
501 the long isoform, despite its ability to complement most phenotypes to at least ~50% of WT  
502 complement levels, has a significant defect in establishing a chronic infection at the infectious  
503 dose used here.

## 504 505 Discussion

506 *Toxoplasma* actin is important for a range of cellular processes, from organelle segregation  
507 and cell-cell communication, to gliding motility: a crucial factor in parasite dissemination  
508 (Andenmatten et al., 2013; Egarter et al., 2014; Periz et al., 2017). Despite the key role of actin  
509 in parasite biology, our understanding of actin dynamics and its regulation remains incomplete.  
510 CAP is a ubiquitous protein with a conserved role in regulating actin dynamics. In this study,  
511 we established that *Toxoplasma* CAP is expressed by an alternative translation initiation site,  
512 giving rise to two independent isoforms: shortCAP and longCAP. Through sequence alignment  
513 we identified that the alternate translation initiation site is conserved only within *Toxoplasma*,  
514 *Neospora* and *Hammondia*. These are all members of the Toxoplasmatinae, a subfamily of the  
515 Apicomplexa phylum, suggesting that while CAP is present in all apicomplexa, the long isoform  
516 is specific to *Toxoplasma* and its closest relatives. Here we investigated the role of both CAP  
517 isoforms in the *Toxoplasma* lytic cycle. Through *in vitro* competition assays, we show that  
518 complementation with shortCAP is enough to overcome the majority (87.6%), but not all, of the  
519 growth defect associated with CAP depletion. This suggests that longCAP is performing a  
520 specific function important for parasite fitness, which shortCAP is unable to compensate for.  
521 Furthermore, longCAP complementation restored 56.9% of the growth defect, arguing for a  
522 degree of functional overlap between the two isoforms. Our experiments have not uncovered  
523 a phenotype that only longCAP can rescue, which would have revealed a unique function. Its  
524 apical localisation, however, makes it tempting to speculate a function in actin regulation during  
525 invasion, which is a phenotype it can fully rescue. It could be that higher actin turnover is  
526 required at the apex and the concentration of longCAP here is fulfilling this need by influencing  
527 G-actin levels. Indeed, it has previously been hypothesised in other organisms that increased  
528 local concentration of CAP results in the sequestration of actin monomers (Ono, 2013).  
529 However, providing evidence for this hypothesis is limited by the fact that the shortCAP isoform  
530 can fully rescue all phenotypes in cell culture under the conditions tested. Given that cell culture  
531 assays do not fully represent the environment *Toxoplasma* normally encounters, we aimed to  
532 tease apart the functions of the two isoforms in mice. Surprisingly, even here the short isoform  
533 appears able to compensate for the lack of longCAP. This suggests that even under conditions  
534 encountered in the natural host, the longCAP isoform plays only a minor role, although dosage  
535 effects or routes of infection may well be confounding factors when assessing virulence of the  
536 different strains. Competition experiments between the mutants *in vivo* may help to tease apart  
537 the independent importance of the isoforms in the future. However, from the *in vitro* competition  
538 assays it can be predicted that parasites expressing two isoforms fare better than those  
539 expressing just one isoform. We cannot rule out that the differences in proteins levels of  
540 longCAP and shortCAP in the single isoform producing lines are affecting the phenotypic  
541 observations. However, both isoforms are able to rescue most phenotypes indicating that the  
542 protein levels do not appear to substantially affect CAP function.

543  
544 Despite being dispensable for type I RH parasite virulence, CAP is essential for type II Pru  
545 parasite virulence in mice, and complementation with either shortCAP or longCAP restored  
546 lethality. At lower, non-lethal doses, longCAP complementation led to markedly reduced cyst  
547 formation in the brain. The underlying basis for this has not been explored here and it could be  
548 that it is the reduced fitness of the strain, rather than stage conversion phenotype, that causes

549 a reduction of parasites reaching the brain. Therefore, the observed virulence of the longCAP  
550 complemented strain is possibly due to the high dosage used, allowing the parasite to  
551 proliferate at high enough rates to overwhelm the immune system. Nevertheless, the basis for  
552 reduced fitness of  $\Delta$ CAP and  $\Delta$ CAP<sup>longCAP</sup> parasites in the murine infection model is likely  
553 multifactorial and we hypothesise that other actin-dependent processes that we have not  
554 assayed here could also contribute to the reduced virulence in mice.

555  
556 The most pronounced phenotype of CAP deletion is loss of rosetting: the highly symmetrical  
557 physical distribution of parasites within the vacuole. Previous studies on actin, myosin I, myosin  
558 J, ADF and formin 3 have suggested that the actomyosin motor is important for rosetting  
559 (Frénal, Dubremetz, et al., 2017; Haase et al., 2015; Periz et al., 2017; Tosetti et al., 2019).  
560 Our  $\Delta$ CAP data further supports this hypothesis. Interestingly, complementing  $\Delta$ CAP parasites  
561 with longCAP restored rosetting in just under half of all vacuoles, with the remainder appearing  
562 as equally disordered as the  $\Delta$ CAP vacuoles. Despite this mixed population, we did not  
563 observe vacuoles with a combination of organised and disorganised parasites, suggesting  
564 rosetting is a binary outcome; either all parasites in a vacuole are connected by a central  
565 residual body, or not. This may suggest that the ability to produce highly organised rosettes is  
566 established during the first round of cell division when the residual body forms. This mixed  
567 population of rosetting and non-rosetting parasites, in an isogenic strain, gave us a unique  
568 opportunity to determine whether rosetting is important for efficient intravacuolar cell-cell  
569 communication. Using longCAP complemented parasites, we show that in rosetting vacuoles  
570 there is efficient RTORP with all parasites able to transfer material to the bleached parasite.  
571 Within the same population, non-rosetting vacuoles displayed severe defects in the RTORP  
572 with parasites seemingly only communicating in pairs. However, despite apparently only  
573 communicating in pairs, all parasites in the vacuole remained synchronised in their stage of  
574 replication. This is different to other studies which suggested that defects in RTORP between  
575 parasites leads to asynchrony in division (Frénal, Jacot, et al., 2017; Periz et al., 2017). Our  
576 results show that neither RTORP between daughter cells nor the formation of a rosette are  
577 predictors for synchronicity of division.

578  
579 The synchronous division in  $\Delta$ CAP parasites could be explained by our FIB SEM results.  
580 Despite their disorganised appearance and loss of rapid cell-cell communication,  $\Delta$ CAP  
581 parasites are still connected by a decentralised residual body. This connection, although not  
582 facilitating rapid transfer of proteins between parasites that are further apart, could allow for  
583 slow or minimal transfer of proteins which is sufficient to synchronise divisions. An alternative  
584 hypothesis could be that metabolites, not proteins, are required to synchronise divisions, and  
585 their diffusion through the decentralised residual body is quicker. It is also a possibility that the  
586 seemingly continuous ER in the residual body, observed here connecting most if not all  
587 parasites, could contribute to synchronicity of division. Whatever the basis for synchronicity is,  
588 rosetting and rapid cell-cell communication are not essential and their analysis cannot be  
589 reliably used to predict whether connections between parasites exist. Recently, Foe *et al*  
590 reported that upon deletion of *ASH4*, a serine hydrolase, parasites were only connected in  
591 pairs but retained synchronicity of division (Foe et al., 2018), similar to our results. An  
592 explanation could be that *ASH4* mutants display a phenotype similar to the CAP phenotype  
593 described here, where, despite the loss of RTORP, parasites remain connected by a  
594 decentralised residual body, allowing synchronicity of division.

595  
596 In summary, our results strongly support an actin regulatory role for CAP in *Toxoplasma*.  
597 Interestingly, actin dependent processes were affected to differing extents in  $\Delta$ CAP parasites,  
598 such as rosetting being completely lost while apicoplast inheritance was unaffected. This  
599 surely reflects the different spatial requirements for actin turnover within a cell. It is likely that  
600 the local concentration of actin, actin binding proteins such as the formins and the different  
601 myosins facilitate this. The results obtained here also leave open a few questions that are  
602 interesting to study in the future. How does actin help to initiate and maintain the centralised  
603 residual body? How are ER connections between parasites in a decentralised residual body

604 maintained and what is the function of this connection? What is the functional role of longCAP  
605 with its high concentration at the apex of the parasite? Why are some actin dependent  
606 processes completely reliant on CAP while others are not? Each of these questions will require  
607 careful analysis and the cell lines described here will likely provide useful tools to investigate  
608 these in the future.

609

#### 610 Materials and methods

##### 611 **Plasmid construction**

612 All primers used in this study are listed in Supplementary File 1. All synthetic DNA used in this  
613 study is listed in Supplementary File 2.

614

615 To generate the CAP-GFP fusion plasmid, pUPRT\_CAP\_GFP, the *Toxoplasma CAP* gene  
616 (TGME49\_310030) 5'UTR was amplified from genomic DNA using primer pair P1/P2 and  
617 Gibson assembled (Gibson et al., 2010) with a synthetic CAP cDNA-*XmaI*-eGFP sequence  
618 (GeneArt strings, Life Technologies, Massachusetts, United States) into *BamHI* and *PacI*  
619 digested UPRT targeting vector pUPRT-HA (Reese et al., 2011).

620

621 To generate the CAP cKO plasmid, pG140\_CAP\_cKO\_LoxP111, the CAP 5'UTR with a LoxP  
622 site inserted 111 bp upstream of the CAP start codon, and a recodonised CAP cDNA-HA  
623 sequence, were synthesised (GeneArt strings, Life Technologies). These DNA fragments were  
624 Gibson cloned (Gibson et al., 2010) into the parental vector p5RT70loxPKillerRedloxPYFP-HX  
625 (Andenmatten et al., 2013) which had been digested using *Apal* and *PacI*, creating an  
626 intermediate plasmid. Next, the CAP 3'UTR was amplified from genomic DNA using primer  
627 pair P3/P4 while mCherry flanked by *GRA* gene UTRs was amplified from pTKO2c (Caffaro et  
628 al., 2013) using primers P5/P6. These PCR products were Gibson cloned (Gibson et al., 2010)  
629 into the *SacI* digested intermediate plasmid to create pG140\_CAP\_cKO\_LoxP111.

630

631 To generate pUPRT\_CAP, the CAP 5'UTR was amplified from genomic DNA using primer pair  
632 P1/P2. This DNA fragment and a synthetic CAP cDNA-*BamHI*-HA sequence (GeneArt strings,  
633 Life Technologies), were Gibson cloned (Gibson et al., 2010) into *BamHI* and *PacI* digested  
634 UPRT targeting vector pUPRT-HA (Reese et al., 2011).

635

636 To generate pUPRT\_CAP\_C6,8A, the CAP 5'UTR was amplified from genomic DNA using  
637 primer pair P1/P2 and, alongside a synthetic CAP cDNA-HA sequence with C6,8A mutations  
638 (GeneArt strings, Life Technologies), was Gibson cloned (Gibson et al., 2010) into *BamHI* and  
639 *PacI* digested UPRT targeting vector pUPRT-HA (Reese et al., 2011).

640

641 To generate pUPRT\_CAP\_M1L, pUPRT\_CAP was amplified with primer pair P7/P8 to  
642 introduce the M1L point mutation.

643

644 To generate pUPRT\_CAP\_M37L, pUPRT\_CAP was amplified with primer pair P9/P10 to  
645 introduce the M37L point mutation.

646

647 To generate pG140\_DiCre, the plasmid containing DiCre\_T2A, two synthetic DNA fragments  
648 were produced containing *Ku80* homology region-alpha-tubulin promoter-FRB-Cre60-T2A-  
649 chloramphenicol resistance cassette-T2A-FKBP-Cre59-SAG1 3'UTR-*Ku80* homology region  
650 (gBlock gene fragments, Integrated DNA Technologies, Iowa, United States). These DNA  
651 fragments were Gibson cloned (Gibson et al., 2010) (into *Apal* and *SacI* digested parental  
652 vector, p5RT70loxPKillerRedloxPYFP-HX (Andenmatten et al., 2013)

653

654 To generate plasmids expressing CAS9 and a single guide RNA (sgRNA), we used plasmid  
655 pSAG1::CAS9-U6::sgUPRT as a backbone (Addgene plasmid #54467) (Shen et al., 2014).  
656 The plasmid was amplified with primer P11 and another containing a sgRNA to replace the  
657 UPRT-targeting sgRNA. Guide RNA sequences were selected using the Eukaryotic Pathogen  
658 CRISPR gRNA Design Tool (Peng & Tarleton, 2015). All sgRNA-expressing plasmids used in

659 this study were generated by this strategy. The sgRNA-containing primers are listed in  
660 Supplementary File 1.

661

662 For creation of plasmids with multiple sgRNAs, first, two separate vectors, each with a sgRNA,  
663 were generated as described above using the parental vector pSAG1::CAS9-U6::sgUPRT.  
664 Then, primers P12/P13 were used to amplify one of the sgRNA regions which was Gibson  
665 cloned (Gibson et al., 2010) into the other *KpnI* and *XhoI* digested plasmid, creating a multiple  
666 sgRNA plasmid.

667

### 668 **Culturing of parasites and host cells**

669 *T. gondii* tachyzoites were cultured in human foreskin fibroblasts (HFF) and in Dulbecco's  
670 modified Eagle's medium (DMEM) with GlutaMAX (Invitrogen, California, United States)  
671 supplemented with 10% fetal bovine serum and maintained at 37°C with 5% CO<sub>2</sub>.

672

### 673 **Generation of parasite lines**

674 To generate the conditional *CAP* knockout strain (RH DiCre $\Delta ku80\Delta hxgpRT$ \_LoxCAP-HA,  
675 referred to here as LoxPCAP), first, the linearised plasmid pG140\_CAP\_cKO\_LoxP111,  
676 carrying the *HXGPRT* cassette, was transfected into the RH DiCre $\Delta ku80\Delta hxgpRT$  strain  
677 (Andenmatten et al., 2013). Resistant parasites were cloned. Next, the DiCre conditional  
678 knockout function of the strain was restored. The linearised pG140\_DiCre plasmid, carrying  
679 the chloramphenicol resistance cassette and homology with the *Ku80* UTRs, was transfected  
680 into the strain. To increase *Ku80*-specific insertion efficiency, a plasmid with multiple *Ku80*-  
681 targeting sgRNAs was generated as described above using primer pairs P11/P14 and  
682 P11/P15. Resistant parasites were cloned. Integration into the *CAP* endogenous locus was  
683 confirmed using primer pairs P16/P17 and P18/P19. Replacement of *CAP* gDNA was  
684 confirmed using primers P20/P21. Excision of the floxed *CAP* sequence was confirmed with  
685 primer pairs P16/P20.

686

687 To complement the LoxPCAP strain with *CAP*-expressing constructs, the linearised plasmid  
688 pUPRT\_CAP, pUPRT\_CAP\_M1L or pUPRT\_CAP\_M37L was transfected alongside  
689 pSAG1::CAS9-U6::sgUPRT. 5-fluorodeoxyuridine (FUDR) resistant parasites were cloned.

690

691 *CAP* was subsequently excised from the above strains by addition of 50 nM rapamycin in  
692 DMSO for 4 hr at 37°C with 5% CO<sub>2</sub>, before washout, and excised parasites were cloned.  
693 Next, to aid with experimentation, an mCherry fluorescent construct was integrated into the  
694 *Ku80* locus, replacing the present DiCre\_T2A construct. mCherry flanked by *GRA* UTRs was  
695 amplified from pG140\_CAP\_cKO\_LoxP111 using primer pair P22/P23 which also carries 30  
696 bp homology with the *Ku80* locus. To increase *Ku80*-specific insertion efficiency, a plasmid  
697 with multiple *Ku80*-targeting sgRNAs was generated as described above using primer pairs  
698 P11/P24 and P11/P25 and co-transfected with the PCR product. A population of parasites  
699 expressing mCherry were sorted by flow cytometry using a BD Influx cell sorter (BD  
700 Biosciences). Parasites were subsequently cloned, generating the strains  $\Delta CAP$ ,  $\Delta CAP^{CAP}$ ,  
701  $\Delta CAP^{shortCAP}$  and  $\Delta CAP^{longCAP}$ .

702

703 The Pru  $\Delta ku80\Delta cap$  strain was generated by amplifying the *HXGPRT* resistance cassette from  
704 the pG140\_CAP\_cKO\_LoxP111 plasmid using primer pair P26/P27. To direct insertion of the  
705 PCR product to the *CAP* locus, a plasmid with multiple *CAP*-targeting sgRNAs was generated  
706 as described above using primer pairs P11/P28 and P11/P29 and co-transfected with the PCR  
707 product. Resistant parasites were cloned. To complement the Pru  $\Delta ku80\Delta cap$  strain with *CAP*-  
708 expressing constructs, the linearised plasmid pUPRT\_CAP, pUPRT\_CAP\_M1L or  
709 pUPRT\_CAP\_M37L was transfected alongside pSAG1::CAS9-U6::sgUPRT. FUDR resistant  
710 parasites were cloned.

711

712 To generate fluorescent  $\Delta gra2$  parasites for FRAP experimentation, mCherry flanked by *GRA*  
713 UTRs was amplified from pG140\_CAP\_cKO\_LoxP111 using primer pair P30/P31 with *UPRT*

714 locus overhangs. This PCR product was co-transfected with pSAG1::CAS9-U6::sgUPRT into  
715 the RH  $\Delta ku80 \Delta gra2$  strain (Rommereim et al., 2016). An FUDR resistant population was  
716 obtained.

717

718 The RH DiCre\_T2A  $\Delta ku80 \Delta hxgprt$  line was generated by integrating the DiCre construct into  
719 the *Ku80* locus in RH  $\Delta ku80 \Delta hxgprt$  parasites (Huynh & Carruthers, 2009). The DiCre  
720 construct was amplified from pG140\_DiCre using primer pair P32/P33 which also carries 30  
721 bp homology with the *Ku80* locus. To increase *Ku80*-specific insertion efficiency, a plasmid  
722 with a *Ku80*-targeting sgRNA was generated as described above using primer pairs P34/P11  
723 and co-transfected with the PCR product. Resistant parasites were cloned.

724

725 To assess the efficiency of rapamycin-dependent excision of the DiCre strains, the Killer Red  
726 gene-swap construct was amplified from p5RT70loxPKillerRedloxPYFP-HX (Andenmatten et  
727 al., 2013) using primer pair P35/P36. This PCR product was co-transfected with  
728 pSAG1::CAS9-U6::sgUPRT for targeted insertion into the *UPRT* locus. FUDR resistant  
729 parasites were cloned.

730

731 To generate a CAP C-terminal endogenous HA-tagged line, a synthetic DNA repair template  
732 was produced containing *CAP* gDNA (a section of which is recodonised), a HA tag and the  
733 *CAP* 3'UTR (gBlock gene fragments, Integrated DNA Technologies). The DNA repair template  
734 was amplified using primer pair P37/P38. To direct insertion of the PCR product to the *CAP*  
735 locus, a plasmid with a single *CAP*-targeting sgRNA was generated as described above using  
736 the primer pairs P39/P11 and was co-transfected with the PCR product into RH  $\Delta ku80$   
737 parasites. A population of parasites expressing the co-transfected Cas9-GFP-containing  
738 plasmid were sorted by flow cytometry using a BD Influx cell sorter (BD Biosciences). ~70% of  
739 these parasites expressed the HA peptide by IFA.

740

#### 741 **Parasite transfection and selection**

742 To generate stable transformants,  $0.5 - 1 \times 10^7$  freshly lysed parasites were transfected with  
743 either 25  $\mu\text{g}$  of linearised template DNA, 5  $\mu\text{g}$  of linearised template DNA and 20  $\mu\text{g}$  of a  
744 corresponding gRNA-specific CRISPR/CAS9 plasmid or template DNA produced from 1  
745 ethanol precipitated PCR and 20  $\mu\text{g}$  of a corresponding gRNA-specific CRISPR/CAS9 plasmid.  
746 Selection on the basis of 5-fluorodeoxyuridine (20  $\mu\text{M}$ ), mycophenolic acid (25  $\mu\text{g ml}^{-1}$ ),  
747 xanthine (50  $\mu\text{g ml}^{-1}$ ) or chloramphenicol (21  $\mu\text{M}$ ) was performed according to the selection  
748 cassette used.

749

#### 750 **Preparation of parasite genomic DNA**

751 Genomic DNA was extracted from *T. gondii* tachyzoites to use as a PCR template by pelleting  
752 parasites and resuspending in PBS. DNA extraction was then performed using the Qiagen  
753 QIAamp DNA blood mini kit as per the manufacturer's protocol.

754

#### 755 **IFA**

756 Parasites were seeded onto HFFs grown on coverslips. 16 – 24 h after seeding, the coverslips  
757 were fixed in 3% formaldehyde for 15 min at room temperature then permeabilised in 0.2%  
758 Triton X-100/PBS for 3-10 min and blocked in 3% BSA/PBS for 1 h. Staining was performed  
759 using appropriate primary antibodies and goat Alexa Fluor 488-, Alexa Fluor 594- and Alexa  
760 Fluor 647-conjugated secondary antibodies (1:2000) alongside DAPI (5  $\mu\text{g/ml}$ ). Coverslips  
761 were mounted on glass slides with SlowFade gold antifade mountant (Life Technologies).  
762 Antibody concentrations used were: rat anti-HA high affinity (Roche, Basel, Switzerland)  
763 (1:1000), rabbit anti-TgCAP (1:2000), mouse anti-GFP (Roche) (1:1000).

764

765 Widefield images were generated with a Ti-E Nikon microscope using a 63x or 100x objective  
766 (Tokyo, Japan). Images were processed with Nikon Elements software. Confocal images were  
767 taken using a Zeiss LSM-780 inverted confocal laser scanning microscope with a 63x  
768 objective. Images were processed with Zeiss Zen Black software (Oberkochen, Germany).

769

## 770 **Western blot**

771 Western blot samples were obtained by scraping and lysing intracellular parasites in 200  $\mu$ l 1x  
772 Laemmli buffer (2% SDS, 10% glycerol, 5% 2-mercaptoethanol, 0.002% bromophenol blue  
773 and 125 mM Tris HCl, pH 6.8). Samples were subjected to SDS-PAGE under reducing  
774 conditions before being transferred to a nitrocellulose membrane. Immunoblotting was  
775 performed with appropriate primary antibodies in 0.1% Tween 20, 3% skimmed milk/PBS.  
776 Bound secondary fluorochrome-conjugated antibodies were visualised using the Odyssey  
777 Infrared Imaging System (LI-COR Biosciences, Nebraska, United States).

778

779 Antibody concentrations used were: rat anti-HA high affinity (Roche) (1:1000), rabbit anti-  
780 TgCAP (1:2000), mouse anti-*Toxoplasma* [TP3] (Abcam, Cambridge, United Kingdom)  
781 (1:1000). Goat anti-mouse IRDye 800CW (LI-COR) (1:20000), Donkey anti-rabbit IRDye  
782 680LT (LI-COR) (1:20000), Goat anti-rat IRDye 680LT (LI-COR) (1:20000).

783

## 784 **Generation of TgCAP antibody**

785 To generate the shortCAP expression plasmid, pET-28\_CAP\_A38toC203, a *Toxoplasma*  
786 shortCAP (M37toC203) recodonised sequence was synthesised (gBlock gene fragments,  
787 Integrated DNA Technologies) and Gibson cloned (Gibson et al., 2010) into *Bam*HI and *Nde*I  
788 digested pET-28a(+) plasmid (Merck, Darmstadt, Germany). This allowed for expression of an  
789 N-terminal 6xHis tagged shortCAP recombinant protein in *Escherichia coli* BL21 cells under  
790 the control of T7 *lac* promoter. Short CAP was expressed and His tag purified using Ni-NTA  
791 affinity purification under native conditions using the standard manufacturer's protocol (Qiagen,  
792 Hilden, Germany). The shortCAP recombinant protein was used to immunize female New  
793 Zealand white rabbits (Covalab, Cambridge, United Kingdom) for generation of polyclonal  
794 antibodies.

795

## 796 **Flow cytometry analysis of DiCre excision**

797 Parasites were added to a HFF monolayer and allowed to invade for 1 h. Then, cre  
798 recombinase-mediated recombination was induced by addition of 50 nM rapamycin in DMSO  
799 for 4 hr before washout. 22 h after infection, parasites were lysed, pelleted and washed twice  
800 in PBS. Parasites were resuspended in 0.5 ml 3% formaldehyde and fixed for 10 min. The  
801 suspension was centrifuged and the pellet washed in PBS before resuspension in PBS. To  
802 remove debris, samples were passed through a 30  $\mu$ m pre-separation filter (Miltenyi Biotec,  
803 Bergisch Gladbach, Germany). 20,000 events were recorded using a BD LSR II flow cytometer  
804 (BD Biosciences California, United States). Killer Red was excited by the 561 nm laser and  
805 detected by a 600 long pass filter and either a 582/15, 610/20 or 620/40 band pass filter. YFP  
806 was excited by the 488 nm laser and detected a 505 long pass filter and either a 525/50 or  
807 530/30 band pass filter. For quantification, and elimination of debris, total number of Killer Red+  
808 parasites was considered 100%. This was performed at day 0, 35 and 65 of the experiment.  
809 For each condition, three biological replicates were analysed. At least 10000 Killer Red+  
810 events were counted for each individual time point.

811

## 812 **Phenotypic characterisations**

### 813 **Competition Assay**

814 mCherry-expressing  $\Delta$ CAP,  $\Delta$ CAP<sup>CAP</sup>,  $\Delta$ CAP<sup>shortCAP</sup> or  $\Delta$ CAP<sup>longCAP</sup> parasites were mixed with  
815 non-fluorescent  $\Delta$ CAP<sup>CAP</sup> parasites at an average ratio of 60/40. At day 0, 15 and 30 in culture,  
816 the ratio was determined by flow cytometry for two biological replicates. Parasites were lysed,  
817 pelleted and washed twice in PBS. Parasites were resuspended in 0.5 ml 3% formaldehyde  
818 and fixed for 5 min. The suspension was centrifuged and the pellet resuspended in 5  $\mu$ g/ml  
819 DAPI/PBS for 10 min. The pellet was washed and resuspended in PBS. To remove debris,  
820 samples were passed through a 30  $\mu$ m pre-separation filter (Miltenyi Biotec). Events were  
821 recorded using a BD LSR II flow cytometer (BD Biosciences). DAPI was excited by the 355  
822 nm laser and detected by a 450/50 band pass filter. mCherry was excited by the 561 nm laser  
823 and detected by a 600 long pass filter and a 610/20 band pass filter. To eliminate debris from

824 the analysis, events were gated on DAPI fluorescence. The ratio of control parasites  
825 (DAPI+/mCherry-) to individual CAP complements (DAPI+/mCherry+) was calculated and  
826 normalised to the day 0 ratio. The data represent two (day 15) and three (day 30) independent  
827 experiments. At least 1500 DAPI+ events were obtained for each individual time point. The  
828 results were statistically tested with a two-way ANOVA test plus a multiple comparison Sidak's  
829 test individually comparing day 15 or day 30 means to their respective day 0 mean, in  
830 GraphPad Prism® 7. The data presented are as mean  $\pm$  s.d.

831

### 832 **Intracellular growth and rosetting assay**

833 Parasites were harvested from a T-25 and added to a coverslip coated with a HFF monolayer.  
834 After 20 h the coverslips were fixed with 3% formaldehyde for 15 min at room temperature.  
835 Coverslips were mounted and mCherry expression used to identify parasites. For each  
836 replicate, 4 random fields were imaged with a 40x objective. Counts were performed in a  
837 blinded manner in duplicate for two independent experiments. The number of parasites per  
838 vacuole was determined by counting at least 265 vacuoles per strain. The number of vacuoles  
839 that rosette was determined by looking at 8-pac vacuoles, at least 90 vacuoles per strain were  
840 counted. The results were statistically tested with a one-way ANOVA test plus a multiple  
841 comparison Dunnett's test comparing all means to the  $\Delta$ CAP<sup>CAP</sup> mean in GraphPad Prism® 7.  
842 The data presented are as mean  $\pm$  s.d.

843

### 844 **Invasion assay**

845 Red/green invasion assays were performed. mCherry-expressing parasites were lysed in an  
846 invasion non-permissive buffer, Endo buffer (44.7 mM K<sub>2</sub>SO<sub>4</sub>, 10 mM MgSO<sub>4</sub>, 106 mM  
847 sucrose, 5 mM glucose, 20 mM Tris-H<sub>2</sub>SO<sub>4</sub>, 3.5 mg/ml BSA, pH 8.2). 250  $\mu$ l of 8x10<sup>5</sup>  
848 parasites/ml in Endo buffer were added to each well of a 24-well flat-bottom plate [Falcon],  
849 which contains a coverslip with a confluent HFF monolayer. The plates were spun at 129 x g  
850 for 1 min at 37°C to deposit parasites onto the monolayer. The Endo buffer was gently removed  
851 and replaced with invasion permissive medium (1% FBS/DMEM). These parasites were  
852 allowed to invade for 1 min at 37°C after which the monolayer was gently washed twice with  
853 PBS and fixed with 3% formaldehyde for 15 min at room temperature. Extracellular parasites  
854 were stained with mouse anti-*Toxoplasma* antigen B1247M (Abcam) 1:1000 and goat anti-  
855 mouse Alexa Fluor 488, following the IFA protocol. For each replicate, 3 random fields were  
856 imaged with a 40x objective. Three independent experiments were performed in duplicate. The  
857 number of intracellular (mCherry+/488-) and extracellular (mCherry+/488+) parasites was  
858 determined by counting, in a blinded fashion, at least 758 parasites per strain. The results were  
859 statistically tested with a one-way ANOVA test plus a multiple comparison Dunnett's test  
860 comparing all means to the  $\Delta$ CAP<sup>CAP</sup> mean in GraphPad Prism® 7. The data presented are as  
861 mean  $\pm$  s.d.

862

### 863 **Egress assay**

864 Parasites were added to a HFF monolayer, in a ibidi  $\mu$ -plate 96 well, and grown for 30 h. The  
865 wells were washed twice with PBS and the media was exchanged for 80  $\mu$ l Ringers solution  
866 (155 mM NaCl, 3 mM KCl, 2 mM CaCl<sub>2</sub>, 1 mM MgCl<sub>2</sub>, 3 mM NaH<sub>2</sub>PO<sub>4</sub>, 10 mM HEPES, 10  
867 mM glucose). To artificially induce egress, 40  $\mu$ l of Ringer's solution containing 150  $\mu$ M BIPPO  
868 (50  $\mu$ M final conc) was added to each well. At specified time points the cells were fixed by  
869 adding 26  $\mu$ l 16% formaldehyde (3% final conc) for 15 min. Cells were washed in PBS and  
870 stained with DAPI (5  $\mu$ g/ml). Automated image acquisition of 25 fields per well was performed  
871 on a Cellomics Array Scan VTI HCS reader (Thermo Scientific, Massachusetts, United States)  
872 using a 20 $\times$  objective. Image analysis was performed using the Compartmental Analysis  
873 BioApplication on HCS Studio (Thermo Scientific). Egress levels were determined in triplicate  
874 for three independent assays. At least 11987 vacuoles per strain were counted at t = 0 s.  
875 Subsequent time point vacuole counts were normalised to t=0 to determine how many  
876 vacuoles had egressed. The results were statistically tested with a two-way ANOVA test plus



877 a multiple comparison Dunnett's test comparing all means to the  $\Delta\text{CAP}^{\text{CAP}}$  mean, at each time  
878 point separately, in GraphPad Prism® 7. The data presented are as mean  $\pm$  s.d.

879

### 880 **Live egress**

881 Parasites were added to a HFF monolayer, in a ibidi  $\mu$ -plate 96 well, and grown for 30 h. The  
882 wells were washed twice with PBS and the media was exchanged for 80  $\mu$ l Ringers solution  
883 (155 mM NaCl, 3 mM KCl, 2 mM CaCl<sub>2</sub>, 1 mM MgCl<sub>2</sub>, 3 mM NaH<sub>2</sub>PO<sub>4</sub>, 10 mM HEPES, 10  
884 mM glucose). The plate was then transferred to a Ti-E Nikon microscope with a 37°C  
885 environmental chamber. To artificially induce egress, 40  $\mu$ l of Ringer's solution containing 150  
886  $\mu$ M BIPPO (50  $\mu$ M final conc) was added to each well after imaging had commenced. Images  
887 were captured every 1.8 s.

888

### 889 **Apicoplast segregation assay**

890 Parasites were added to a HFF monolayer and grown for 20 h before fixation with ice cold  
891 methanol for 2 min at room temperature. IFAs were performed using a streptavidin-Alexa Fluor  
892 594 conjugate (Invitrogen) as a marker for the apicoplast. Correct apicoplast segregation was  
893 determined in duplicate for three independent assays. At least 228 vacuoles were counted per  
894 strain. Counts were performed in a blinded manner. The results were statistically tested with  
895 an unpaired t test in GraphPad Prism® 7. The data presented are as mean  $\pm$  s.d.

896

### 897 **Synchronicity of division and daughter cell orientation assay**

898 Parasites were added to a HFF monolayer and grown for 20 h before fixation with 3%  
899 formaldehyde for 15 min at room temperature. IFAs were performed using rat anti-IMC3  
900 antibodies. To determine the synchronicity of cell division within the vacuoles, anti-IMC3  
901 staining was used to evaluate the stage of daughter cell development. Vacuoles were scored  
902 as synchronous if all daughter cells were at the same stage of development. Vacuoles were  
903 counted blind in triplicate for three independent experiments. At least 275 vacuoles were  
904 counted per strain. The results were statistically tested with an unpaired t test in GraphPad  
905 Prism® 7. The data presented are as mean  $\pm$  s.d. Daughter cell orientation was quantified in  
906 triplicate for three independent experiments. At least 312 mother cells were counted blind, per  
907 strain. The results were statistically tested with a one-way ANOVA test plus a multiple  
908 comparison Dunnett's test comparing all means to the  $\Delta\text{CAP}^{\text{CAP}}$  mean in GraphPad Prism® 7.  
909 The data presented are as mean  $\pm$  s.d.

910

### 911 **3D motility assay**

912 Motility assays were performed as previously described (Leung et al., 2014), with minor  
913 modifications. Parasites were syringe-released from a HFF monolayer (one heavily infected  
914 T75 flask per strain) by passing through a 27 gauge needle and filtering through a 3  $\mu$ m  
915 Nuclepore filter. Parasites were then centrifuged (1,000 x g for 2 min) and resuspended in 40  
916  $\mu$ l motility media supplemented with 0.3 mg/mL Hoescht 33342. Matrigel was thawed on ice to  
917 prevent polymerization and combined with parasites and motility media in a ratio of 3:1:3  
918 respectively. Pitta chambers were perfused with 10  $\mu$ l of this suspension and incubated at  
919 27°C for 7 minutes on a thermoplate. Chambers were incubated in the heated (35°C +/- 1°C)  
920 microscope enclosure for 3 min prior to imaging. Parasite nuclei were imaged, using a 20x  
921 objective, capturing 61 – 63 stacks of 41 z-slices 1  $\mu$ m apart. To ensure conditions remained  
922 constant between parasite lines, samples used for capture were alternated. Datasets were  
923 exported to Imaris x64 v9.2.1. Using the ImarisTrack module parasites were tracked in a region  
924 of interest from which 1  $\mu$ m has been cropped from the x and y edges to eliminate edge  
925 artefacts. Parasites were identified, after background subtraction, using spot detection with  
926 estimated size of 4  $\mu$ m (xy) and 8  $\mu$ m (z). Spots were filtered to exclude all that had duration  
927 of less than 3 seconds to minimise tracking artifacts. An autoregressive motion tracking  
928 algorithm was applied with a maximum distance of 6  $\mu$ m and a maximum gap size of 3.  
929 Datasets were manually inspected to ensure appropriate tracking and to remove artifacts and  
930 trajectories tracked from multiple identified spots. Percent moving was calculated as the

931 number of trajectories (>2  $\mu\text{m}$  displacement) / number of objects in frame 3 (>3 s duration).  
932 Trajectory parameters were extracted directly from Imaris software. Data shown are derived  
933 from 4 independent biological replicates, each consisting of a minimum of two technical  
934 replicates. For all analysis, means and standard deviation were calculated for four independent  
935 biological replicates before statistical analysis using an unpaired t-test in GraphPad Prism®7.  
936 For the three strain experiment,  $\Delta\text{CAP}^{\text{shortCAP}}$  and  $\Delta\text{CAP}^{\text{longCAP}}$  were each compared to  
937  $\Delta\text{CAP}^{\text{CAP}}$ . All technical replicates are presented in the figures, together with their mean  $\pm$  s.d.  
938

### 939 **Dense granule trafficking assay**

940 For each condition  $1 \times 10^7$  parasites were transiently transfected with 30  $\mu\text{g}$  of pTub SAG1 $\Delta$ GPI-  
941 mCherry plasmid (Heaslip et al., 2016) and immediately added to a confluent HFF monolayer  
942 in a Mattek® 35 mm dish, coverslip 1.5. 12-15 h after infection the monolayers were washed  
943 3 times with pre-warmed Gibco® Fluorobrite™ DMEM supplemented with 4% Fetal Bovine  
944 Serum. The coverslips were immediately used for imaging. The acquisitions were made with  
945 an Olympus IX71 coupled to a DELTAVISION™ Elite imaging system in a 37°C environmental  
946 chamber. The acquisition for each condition were made sequentially from the washing step to  
947 the acquisition with a random order to avoid any artifactual data. The acquisition analysis was  
948 made with Fiji and the MTrackJ plugin. The data represent three independent experiments. At  
949 least 43 parasites and 273 direct runs were counted per strain. The results were statistically  
950 tested with a one-way ANOVA test plus a multiple comparison Dunnett's test comparing all  
951 means to the  $\Delta\text{CAP}^{\text{CAP}}$  mean in GraphPad Prism® 7. The data presented are as mean  $\pm$  s.d.  
952

### 953 **FRAP**

954 Parasites were inoculated on a confluent layer of HFFs 20 h before experiments were  
955 performed using a Zeiss LSM-780 inverted confocal laser scanning microscope at 37°C.  
956 Acquisition and processing were performed with the Zeiss Zen Black software. Images were  
957 taken for 2 min (one image per second). Three pre-bleach images were recorded before the  
958 region of interest was photobleached ten times with a 561 nm laser at 100% power.  
959 Fluorescence intensity is presented as a percentage relative to the same area pre-bleach.  
960 These normalised intensity values were also used for the calculations below. To calculate  
961 percentage of fluorescence recovery, the final reading (116 s post-bleach) was subtracted from  
962 the reading immediately post-bleach,  $t = 3$  s, to give percentage recovery after 116 s. To  
963 calculate percentage loss of fluorescence, the reading immediately post-bleach,  $t = 3$  s, was  
964 subtracted from the final reading (116 s post-bleach) to give percentage loss after 116 s. These  
965 percentages were used to generate the heat map. At least 11 vacuoles were counted per strain  
966 across at least two independent experiments. The results were statistically tested with a one-  
967 way ANOVA test plus a multiple comparison Dunnett's test comparing all means to the  
968  $\Delta\text{CAP}^{\text{CAP}}$  mean in GraphPad Prism® 7. The data presented are as mean  $\pm$  s.d. To assess  
969 recovery type, at least 11 vacuoles were counted per strain across at least two independent  
970 experiments. The results were statistically tested with a Chi-square in GraphPad Prism® 7.  
971

### 972 **Tape unroofing SEM**

973 Parasites were inoculated on a confluent HFF monolayer 24 h before fixation in EM fixative  
974 (2.5% glutaraldehyde, 4% formaldehyde in 0.1 M phosphate buffer) for 30 min. Cells were  
975 washed in 0.1 M phosphate buffer (PB) and stored in 1% formaldehyde in PB at 4°C. Cells  
976 were then washed in PB at room temperature, then washed in ddH<sub>2</sub>O at RT. The cells were  
977 dehydrated stepwise from 70% to 100% ethanol before critical point drying from acetone in a  
978 CPD300 (Leica Microsystems, Vienna, Austria). After drying, the coverslips were mounted on  
979 stubs, and the HFF cells were unroofed by placing Scotch tape on the coverslips and gently  
980 peeling it off, exposing the host cytoplasm and the parasitophorous vacuoles. The cells were  
981 coated with 7 nm platinum in a Q150R Sputter Coater (Quorum Tech, East Sussex, UK)  
982 before viewing in a Phenom ProX SEM (Thermo Scientific) at 10 kV, 1024 x 1024 pixel  
983 frame, on 'high' quality.

984

985 **FIB SEM**

986 Immediately following FRAP experimentation, as described above, parasites were fixed in 4%  
987 formaldehyde for 15 min at 37°C before washing in 0.1 M PB. Cells were then fixed in EM  
988 fixative (2.5% glutaraldehyde, 4% formaldehyde in 0.1 M PB) for 30 min at room temperature.  
989 Cells were washed in 0.1 M PB and stored in 1% formaldehyde in 0.1 M PB. After fixation,  
990 samples were transferred to a Pelco BioWave Pro+ microwave (Ted Pella) for processing  
991 using a protocol adapted from the NCMIR protocol (Deerinck et al., 2010). See Supplementary  
992 File 3 for full BioWave program details. The SteadyTemp plate was set to 21°C unless  
993 otherwise indicated. Each step was performed in the microwave, except for the buffer  
994 and ddH<sub>2</sub>O wash steps, which consisted of two washes on the bench and two washes in the  
995 microwave (250 W for 40 s). The cells were washed (as above) in 0.1 M PB, stained with 2%  
996 osmium tetroxide and 1.5% potassium ferricyanide (v/v) for 14 min under vacuum (with/without  
997 100 W power at 2 min intervals), and then washed in ddH<sub>2</sub>O (as above). Next, the cells were  
998 incubated in 1% thiocarbohydrazide in ddH<sub>2</sub>O (w/v) for 14 min (vacuum, 100 W on/off at 2  
999 min intervals) with SteadyTemp plate set to 40°C, followed by ddH<sub>2</sub>O washes (as above), and  
1000 then a further stain with 2% osmium tetroxide in ddH<sub>2</sub>O (w/v) for 14 min (vacuum, 100 W on/off  
1001 at 2 min intervals), followed by ddH<sub>2</sub>O washes (as above). The cells were then incubated  
1002 in 1% aqueous uranyl acetate (vacuum, 100 W on/off at 2 min intervals, SteadyTemp 40°C),  
1003 and then washed in ddH<sub>2</sub>O (as above, except with SteadyTemp at 40°C). Walton's lead  
1004 aspartate was then applied (vacuum, 100 W on/off at 2 min intervals, SteadyTemp 50°C), and  
1005 the cells were washed (as above) and dehydrated in a graded ethanol series (70%, 90%, and  
1006 100%, twice each), at 250 W for 40 s without vacuum. Exchange into Durcupan ACM® resin  
1007 (Sigma-Aldrich, Missouri, United States) was performed in 50% resin in ethanol, at 250 W for  
1008 3 min, with vacuum cycling (on/off at 30 sec intervals), and then pure Durcupan was infiltrated  
1009 in four microwave steps with the same settings, before embedding at 60°C for 48 h.

1010

1011 Focused ion beam scanning electron microscopy (FIB SEM) data was collected using a  
1012 Crossbeam 540 FIB SEM with Atlas 5 for 3-dimensional tomography acquisition (Zeiss).  
1013 Segments of the cell monolayer containing the cells of interest were trimmed, polished with a  
1014 diamond knife (removing uneven resin at the base of the monolayer to provide a flat surface  
1015 for tracking marks), mounted on a standard 12.7 mm SEM stub using conductive epoxy (ITW  
1016 Chemtronics), and coated with a 5 nm layer of platinum.

1017

1018 The specific cells of interest were relocated by imaging through the platinum coating at an  
1019 accelerating voltage of 20 kV and correlating to previously acquired fluorescence microscopy  
1020 images. After preparation for milling and tracking, images were acquired at 5 nm isotropic  
1021 resolution throughout each region of interest, using a 10 μs dwell time. During acquisition the  
1022 SEM was operated at an accelerating voltage of 1.5 kV with 1 nA current. The EsB detector  
1023 was used with a grid voltage of 1,200 V. Ion beam milling was performed at an accelerating  
1024 voltage of 30 kV and current of 700 pA.

1025

1026 After cropping to the specific region of interest comprising the entire extent of the PV ( $\Delta\text{CAP}^{\text{CAP}}$ ;  
1027 3080 x 634 x 2509 pixels; 15.4 x 3.17 x 12.545 μm;  $\Delta\text{CAP}$ ; 4065 x 1136 x 4490 pixels; 20.325  
1028 x 5.68 x 22.45 μm) and aligning the dataset (gradient align; Atlas 5), the images were  
1029 processed to suppress noise and slightly enhance sharpness (gaussian blur 0.75 radius,  
1030 followed by unsharp mask radius 1, strength 0.6; Fiji) prior to reorienting and reslicing in the  
1031 YZ plane (assigned as the XY plane for segmentation), and scaling to 10 nm isotropic  
1032 resolution for segmentation and display.

1033

1034 Selected structures were segmented manually from the FIB SEM datasets and 3D  
1035 reconstructions were made using the 3dmod program of IMOD (Kremer et al., 1996). The  
1036 normal and decentralised residual body structures were manually skeletonised by tracing the  
1037 approximate central axis of the structure from the posterior pore of each tachyzoite using open  
1038 contours. Thus, the green skeleton follows the lumen of the connections between parasites.

1039 The minimum number of points were placed that would still ensure the contour remained at  
1040 the central axis of the volume. Where the structure branched, points linking contours from  
1041 multiple extensions were placed at the approximate centre of the branch point volume. The  
1042 contours were then rendered as a 50 or 100 nm tube to aid visualisation (tube diameter chosen  
1043 depending on view). This model was then inspected in the X, Y, and Z-planes and corrections  
1044 made to ensure the skeleton followed the approximate centre through the volume. Since not  
1045 all RB-like structure extensions ended at the posterior pole of a tachyzoite, the posterior poles  
1046 were highlighted by segmenting them with open contours with points at every 40 nm in Z,  
1047 following the edge of the cytosol (the ribosome-containing electron lucent space where it meets  
1048 the intermediate electron density surrounding the inner membrane complex), and meshing the  
1049 contour as a 50 nm tube. A selected region of the putative ER lipid bilayer outer leaflet was  
1050 segmented with closed contours drawn every 5-20 nm in Z (smaller Z intervals where needed  
1051 to capture fenestrations/complexity); from an approximately square region around the inner  
1052 face of two of the basal pores up to an arbitrary point along the decentralised residual body  
1053 structure. Contour gaps were placed at the edge of this region. Two tachyzoites were also  
1054 highlighted by partial coarse segmentation; closed contours drawn every 250 nm in Z through  
1055 the main body of the cell (segmentation of the complex top and bottom of the tachyzoites was  
1056 omitted for clarity).

1057

### 1058 **Animals**

1059 C57BL/6 (wild type) mice were bred and housed under pathogen-free conditions in the  
1060 biological research facility at the Francis Crick Institute in accordance with the Home Office UK  
1061 Animals (Scientific Procedures) Act 1986. All work was approved by the UK Home Office  
1062 (project license PDE274B7D), the Francis Crick Institute Ethical Review Panel, and conforms  
1063 to European Union directive 2010/63/EU. All mice used in this study were male and between  
1064 7- to 9-week old.

1065

1066 Mice were infected with *T. gondii* tachyzoites by intraperitoneal injection (i.p.) with either 25, 5  
1067 x 10<sup>3</sup> parasites (cyst formation) or 5 x 10<sup>4</sup> parasites (survival) in 200 µl medium on day 0. Mice  
1068 were monitored and weighed regularly for the duration of the experiments.

1069 For serum samples, mice were euthanized and blood collected into blood serum collection  
1070 tubes (SAI, Infusion technologies) by puncturing the jugular vein. Blood was allowed to clot at  
1071 room temperature for 30 min, before tubes were centrifuged at 1500 x g for 10 min. Serum  
1072 was collected and stored at -20°C until analysis.

1073

### 1074 ***Toxoplasma* serum antibody ELISA**

1075 *Toxoplasma* soluble antigens were extracted as previously described (Silva et al., 2007). In  
1076 short, parasites were syringe-lysed, washed once with PBS, and adjusted to 1 x 10<sup>8</sup>  
1077 tachyzoites/ml with PBS containing protease inhibitors (cOmplete mini, Roche). Parasites  
1078 were lysed by five freeze-thaw cycles (liquid nitrogen/37°C), followed by ultrasound sonication  
1079 on ice (five 60 Hz cycle for 1 min each). Samples were centrifuged at 10,000 x g for 30 min at  
1080 4 °C before supernatants were collected and protein content was determined using the BCA  
1081 Protein Assay Kit (Pierce, Thermo Fisher Scientific) following the manufacturer's instructions.

1082

1083 To detect *Toxoplasma* antibodies in murine serum samples, 96-well plates (flat bottom, high-  
1084 binding) were coated overnight with 2 µg/ml *Toxoplasma* soluble antigens at 4°C. Plates were  
1085 washed with PBS/0.05% Tween-20 (v/v) (PBS-T) before blocked with 1% BSA (w/v) in PBS  
1086 for 2 h at room temperature. Bound antigens were incubated with murine sera diluted 1/10 in  
1087 1% BSA/PBS for 2 h at room temperature, washed three times with PBS-T and bound  
1088 antibodies detected by incubation for 2 h at room temperature with anti-mouse  
1089 Immunoglobulins (HRP conjugate, Darko) diluted 1/1000 in 1% BSA/PBS. Finally, plates were  
1090 washed three times with PBS-T and developed by adding TMB substrate solution (Thermo  
1091 Fisher Scientific). The TMB reaction was stopped by adding 2 N sulphuric acid and the  
1092 absorbance measured (OD<sub>450</sub> minus OD<sub>540</sub> wave length correction) using the VersaMax™  
1093 Microplate Reader with SoftMax® Pro Software.

1094  
1095  
1096  
1097  
1098  
1099  
1100  
1101  
1102  
1103  
1104  
1105  
1106  
1107  
1108  
1109  
1110  
1111  
1112  
1113  
1114  
1115  
1116  
1117  
1118  
1119  
1120  
1121  
1122  
1123  
1124  
1125  
1126  
  
1127  
1128  
  
1129  
1130  
1131  
  
1132  
1133  
  
1134

### **Mouse brain collection and preparation for cyst counting**

To determine the number of cysts in the brain of infected animals, mice were euthanized and the brain extracted from the skull. The brain was homogenised in 1 ml PBS and stained with Rhodamine-conjugated *Dolichos biflorus* agglutinin (1/1000; Vector Laboratories) for 1 h at room temperature. Fluorescently labelled cysts were counted using a Ti-E Nikon microscope.

### **Statistical analysis**

Statistical tests used are stated in individual sections above. *P*-values significance thresholds were set at: \*\*\*\* *P* < 0.0001, \*\*\* *P* < 0.001, \*\* *P* < 0.01 and \* *P* < 0.05. All significant results are labelled with a line and asterisk(s) in the graphs.

### Acknowledgements

We thank Marc-Jan Gubbels (Boston College) for gifting the IMC3 antibody, Markus Meissner (University of Glasgow) for the pG140 plasmid, Michael Reese (University of Texas Southwestern Medical Center) for the pUPRT-HA plasmid, David Sibley (Washington University) for the CRISPR/Cas9 plasmid and Caia Dominicus (Francis Crick Institute) for critically reading the manuscript. We also thank the following members of science technology platforms at the Francis Crick Institute for their support: Matt Renshaw (light microscopy), Michael Howell (high throughput screening), Damian Carragher, Rhys Hefin, Phil Hobson and Graham Preece (flow cytometry). This work was supported by awards to MT by The Francis Crick Institute (<https://www.crick.ac.uk/>), which receives its core funding from Cancer Research UK (FC001189; <https://www.cancerresearchuk.org>), the UK Medical Research Council (FC001189; <https://www.mrc.ac.uk/>) and the Wellcome Trust (FC001189; <https://wellcome.ac.uk/>). This work was supported by US Public Health Service grants AI137767 and AI139201 to GEW and National Institutes of Health grant awarded to Aoife Heaslip (AI121885).

### Competing interests

The authors have declared that no competing interests exist.

### References

- Andenmatten, N., Egarter, S., Jackson, A. J., Jullien, N., Herman, J.-P., & Meissner, M. (2013). Conditional genome engineering in *Toxoplasma gondii* uncovers alternative invasion mechanisms. *Nature Methods*, *10*(2), 125–127. doi:10.1038/nmeth.2301
- Bannister, L. H., & Mitchell, G. H. (1995). The role of the cytoskeleton in *Plasmodium falciparum* merozoite biology: an electron-microscopic view. *Annals of Tropical Medicine and Parasitology*, *89*(2), 105–111. doi:10.1080/00034983.1995.11812940
- Baum, J., Papenfuss, A. T., Baum, B., Speed, T. P., & Cowman, A. F. (2006). Regulation of apicomplexan actin-based motility. *Nature Reviews Microbiology*, *4*(8), 621–628. doi:10.1038/nrmicro1465

- 1135 Bertling, E., Hotulainen, P., Mattila, P. K., Matilainen, T., Salminen, M., & Lappalainen, P.  
1136 (2004). Cyclase-associated protein 1 (CAP1) promotes cofilin-induced actin dynamics  
1137 in mammalian nonmuscle cells. *Molecular Biology of the Cell*, 15(5), 2324–2334.  
1138 doi:10.1091/mbc.e04-01-0048
- 1139 Black, M. W., Arrizabalaga, G., & Boothroyd, J. C. (2000). Ionophore-resistant mutants of  
1140 *Toxoplasma gondii* reveal host cell permeabilization as an early event in egress. *Mol*  
1141 *Cell Biol*, 20(24), 9399–408. doi:10.1128/MCB.20.24.9399-9408.2000
- 1142 Black, M. W., & Boothroyd, J. C. (2000). Lytic cycle of *Toxoplasma gondii*. *Microbiology and*  
1143 *Molecular Biology Reviews*, 64(3), 607–623. doi:10.1128/MMBR.64.3.607-623.2000
- 1144 Brown, K. M., Long, S., & Sibley, L. D. (2017). Plasma membrane association by N-acylation  
1145 governs PKG function in *Toxoplasma gondii*. *MBio*, 8(3), e00375–17.
- 1146 Caffaro, C. E., Koshy, A. A., Liu, L., Zeiner, G. M., Hirschberg, C. B., & Boothroyd, J. C. (2013).  
1147 A nucleotide sugar transporter involved in glycosylation of the *Toxoplasma* tissue cyst  
1148 wall is required for efficient persistence of bradyzoites. *PLOS Pathogens*, 9(5),  
1149 e1003331. doi:10.1371/journal.ppat.1003331
- 1150 Deerinck, T. J., Bushong, E. A., Thor, A., & Ellisman, M. H. (2010). NCMIR methods for 3D EM:  
1151 A new protocol for preparation of biological specimens for serial block face scanning  
1152 electron microscopy. Retrieved November 21, 2018, from  
1153 [http://gatan.actonservice.com/acton/attachment/11413/f-017e/1/-/-/-/-/](http://gatan.actonservice.com/acton/attachment/11413/f-017e/1/-/-/-/-/ /sbfsem%20sample%20prep%20protocol.pdf?modal=1)  
1154 [/sbfsem%20sample%20prep%20protocol.pdf?modal=1](http://gatan.actonservice.com/acton/attachment/11413/f-017e/1/-/-/-/-/ /sbfsem%20sample%20prep%20protocol.pdf?modal=1)
- 1155 Delbac, F., Sanger, A., Neuhaus, E. M., Stratmann, R., Ajioka, J. W., Toursel, C., Herm-Gotz,  
1156 A., Tomavo, S., Soldati, T., & Soldati, D. (2001). *Toxoplasma gondii* myosins B/C: one  
1157 gene, two tails, two localizations, and a role in parasite division. *The Journal of Cell*  
1158 *Biology*, 155(4), 613–624. doi:10.1083/jcb.200012116

- 1159 Dobrowolski, J. M., Niesman, I. R., & Sibley, L. D. (1997). Actin in the parasite *Toxoplasma*  
1160 *gondii* is encoded by a single copy gene, ACT1 and exists primarily in a globular form.  
1161 *Cell Motility*, 37(3), 253–262. doi:10.1002/(SICI)1097-0169(1997)37:3<253::AID-  
1162 CM7>3.0.CO;2-7
- 1163 Egarter, S., Andenmatten, N., Jackson, A. J., Whitelaw, J. A., Pall, G., Black, J. A., Ferguson, D.  
1164 J. P., Tardieux, I., Mogilner, A., & Meissner, M. (2014). The *Toxoplasma* acto-MyoA  
1165 motor complex is important but not essential for gliding motility and host cell  
1166 invasion. *PLoS ONE*, 9(3), e91819. doi:10.1371/journal.pone.0091819
- 1167 Foe, I. T., Child, M. A., Majmudar, J. D., Krishnamurthy, S., van der Linden, W. A., Ward, G. E.,  
1168 Martin, B. R., & Bogyo, M. (2015). Global analysis of palmitoylated proteins in  
1169 *Toxoplasma gondii*. *Cell Host & Microbe*, 18(4), 501–511.  
1170 doi:10.1016/j.chom.2015.09.006
- 1171 Foe, I. T., Onguka, O., Amberg-Johnson, K., Garner, R. M., Amara, N., Beatty, W., Yeh, E., &  
1172 Bogyo, M. (2018). The *Toxoplasma gondii* active serine hydrolase 4 regulates parasite  
1173 division and intravacuolar parasite architecture. *MSphere*, 3(5), e00393-18.  
1174 doi:10.1128/mSphere.00393-18
- 1175 Fox, B. A., Ristuccia, J. G., Gigley, J. P., & Bzik, D. J. (2009). Efficient gene replacements in  
1176 *Toxoplasma gondii* strains deficient for nonhomologous end joining. *Eukaryotic Cell*,  
1177 8(4), 520–529. doi:10.1128/EC.00357-08
- 1178 Frénal, K., Dubremetz, J.-F., Lebrun, M., & Soldati-Favre, D. (2017). Gliding motility powers  
1179 invasion and egress in Apicomplexa. *Nature Reviews Microbiology*, 15, 645.  
1180 doi:10.1038/nrmicro.2017.86
- 1181 Frénal, K., Jacot, D., Hammoudi, P.-M., Graindorge, A., Maco, B., & Soldati-Favre, D. (2017).  
1182 Myosin-dependent cell-cell communication controls synchronicity of division in acute

- 1183 and chronic stages of *Toxoplasma gondii*. *Nature Communications*, *8*, ncomms15710.  
1184 doi:10.1038/ncomms15710
- 1185 Garrison, E., Treeck, M., Ehret, E., Butz, H., Garbuz, T., Oswald, B. P., Settles, M., Boothroyd,  
1186 J., & Arrizabalaga, G. (2012). A forward genetic screen reveals that calcium-  
1187 dependent protein kinase 3 regulates egress in *Toxoplasma*. *PLoS Pathog*, *8*(11).  
1188 doi:10.1371/journal.ppat.1003049
- 1189 Gibson, D. G., Smith, H. O., Iii, C. A. H., Venter, J. C., & Merryman, C. (2010). Chemical  
1190 synthesis of the mouse mitochondrial genome. *Nature Methods*, *7*(11), 901–903.  
1191 doi:10.1038/nmeth.1515
- 1192 Graindorge, A., Fréchal, K., Jacot, D., Salamun, J., Marq, J. B., & Soldati-Favre, D. (2016). The  
1193 conoid associated motor MyoH is indispensable for *Toxoplasma gondii* entry and exit  
1194 from host cells. *PLoS Pathog*, *12*(1), e1005388. doi:10.1371/journal.ppat.1005388
- 1195 Haase, S., Zimmermann, D., Olshina, M. A., Wilkinson, M., Fisher, F., Tan, Y. H., Stewart, R. J.,  
1196 Tonkin, C. J., Wong, W., Kovar, D. R., & others. (2015). Disassembly activity of actin-  
1197 depolymerizing factor (ADF) is associated with distinct cellular processes in  
1198 apicomplexan parasites. *Molecular Biology of the Cell*, *26*(17), 3001–3012.  
1199 doi:10.1091/mbc.E14-10-1427
- 1200 Hakimi, M.-A., Olias, P., & Sibley, L. D. (2017). *Toxoplasma* effectors targeting host signaling  
1201 and transcription. *Clinical Microbiology Reviews*, *30*(3), 615–645.  
1202 doi:10.1128/CMR.00005-17
- 1203 Halonen, S. K., & Weiss, L. M. (2013). Chapter 8 - Toxoplasmosis. In H. H. Garcia, H. B.  
1204 Tanowitz, & O. H. Del Brutto (Eds.), *Handbook of Clinical Neurology* (Vol. 114, pp.  
1205 125–145). Elsevier. doi:10.1016/B978-0-444-53490-3.00008-X



- 1206 Heaslip, A. T., Nelson, S. R., & Warshaw, D. M. (2016). Dense granule trafficking in  
1207 *Toxoplasma gondii* requires a unique class 27 myosin and actin filaments. *Molecular*  
1208 *Biology of the Cell*, 27(13), 2080–2089. doi:10.1091/mbc.E15-12-0824
- 1209 Hliscs, M., Sattler, J. M., Tempel, W., Artz, J. D., Dong, A., Hui, R., Matuschewski, K., &  
1210 Schuler, H. (2010). Structure and function of a G-actin sequestering protein with a  
1211 vital role in malaria oocyst development inside the mosquito vector. *Journal of*  
1212 *Biological Chemistry*, 285(15), 11572–11583. doi:10.1074/jbc.M109.054916
- 1213 Howard, B. L., Harvey, K. L., Stewart, R. J., Azevedo, M. F., Crabb, B. S., Jennings, I. G.,  
1214 Sanders, P. R., Manallack, D. T., Thompson, P. E., Tonkin, C. J., & Gilson, P. R. (2015).  
1215 Identification of potent phosphodiesterase inhibitors that demonstrate cyclic  
1216 nucleotide-dependent functions in apicomplexan parasites. *ACS Chemical Biology*,  
1217 10(4), 1145–1154. doi:10.1021/cb501004q
- 1218 Huynh, M.-H., & Carruthers, V. B. (2009). Tagging of endogenous genes in a *Toxoplasma*  
1219 *gondii* strain lacking Ku80. *Eukaryotic Cell*, 8(4), 530–539. doi:10.1128/EC.00358-08
- 1220 Jacot, D., Daher, W., & Soldati-Favre, D. (2013). *Toxoplasma gondii* myosin F, an essential  
1221 motor for centrosomes positioning and apicoplast inheritance. *The EMBO Journal*,  
1222 32(12), 1702–1716. doi:10.1038/emboj.2013.113
- 1223 Kim, J. H., Lee, S.-R., Li, L.-H., Park, H.-J., Park, J.-H., Lee, K. Y., Kim, M.-K., Shin, B. A., & Choi,  
1224 S.-Y. (2011). High cleavage efficiency of a 2A peptide derived from porcine  
1225 teschovirus-1 in human cell lines, zebrafish and mice. *PLOS ONE*, 6(4), e18556.  
1226 doi:10.1371/journal.pone.0018556
- 1227 Kozak, M. (1987a). An analysis of 5'-noncoding sequences from 699 vertebrate messenger  
1228 RNAs. *Nucleic Acids Research*, 15(20), 8125–8148. doi:10.1093/nar/15.20.8125

- 1229 Kozak, M. (1987b). At least six nucleotides preceding the AUG initiator codon enhance  
1230 translation in mammalian cells. *Journal of Molecular Biology*, 196(4), 947–950.  
1231 doi:10.1016/0022-2836(87)90418-9
- 1232 Kremer, J. R., Mastronarde, D. N., & McIntosh, J. R. (1996). Computer visualization of three-  
1233 dimensional image data using IMOD. *Journal of Structural Biology*, 116(1), 71–76.  
1234 doi:10.1006/jsbi.1996.0013
- 1235 Leung, J. M., Rould, M. A., Konradt, C., Hunter, C. A., & Ward, G. E. (2014). Disruption of  
1236 *TgPHIL1* alters specific parameters of *Toxoplasma gondii* motility measured in a  
1237 quantitative, three-dimensional live motility assay. *PLoS ONE*, 9(1), e85763.  
1238 doi:10.1371/journal.pone.0085763
- 1239 Lorestani, A., Ivey, F. D., Thirugnanam, S., Busby, M. A., Marth, G. T., Cheeseman, I. M., &  
1240 Gubbels, M. J. (2012). Targeted proteomic dissection of *Toxoplasma* cytoskeleton  
1241 sub-compartments using MORN1. *Cytoskeleton*, 69(12), 1069–85.  
1242 doi:10.1002/cm.21077
- 1243 Lourido, S., Tang, K., & Sibley, L. D. (2012). Distinct signalling pathways control *Toxoplasma*  
1244 egress and host-cell invasion. *The EMBO Journal*, 31(24), 4524–4534.  
1245 doi:10.1038/emboj.2012.299
- 1246 Magno, R. C., Lemgruber, L., Vommaro, R. C., De Souza, W., & Attias, M. (2005).  
1247 Intravacuolar network may act as a mechanical support for *Toxoplasma gondii* inside  
1248 the parasitophorous vacuole. *Microscopy Research and Technique*, 67(1), 45–52.  
1249 doi:10.1002/jemt.20182
- 1250 Makkonen, M., Bertling, E., Chebotareva, N. A., Baum, J., & Lappalainen, P. (2013).  
1251 Mammalian and malaria parasite cyclase-associated proteins catalyze nucleotide

- 1252 exchange on G-actin through a conserved mechanism. *Journal of Biological*  
1253 *Chemistry*, 288(2), 984–994. doi:10.1074/jbc.M112.435719
- 1254 Mattila, P. K., Quintero-Monzon, O., Kugler, J., Moseley, J. B., Almo, S. C., Lappalainen, P., &  
1255 Goode, B. L. (2004). A high-affinity interaction with ADP-actin monomers underlies  
1256 the mechanism and in vivo function of Srv2/cyclase-associated protein. *Molecular*  
1257 *Biology of the Cell*, 15(11), 5158–5171. doi:10.1091/mbc.e04-06-0444
- 1258 McCoy, J. M., Whitehead, L., van Dooren, G. G., & Tonkin, C. J. (2012). TgCDPK3 regulates  
1259 calcium-dependent egress of *Toxoplasma gondii* from host cells. *PLoS Pathogens*,  
1260 8(12), e1003066. doi:10.1371/journal.ppat.1003066
- 1261 Mehta, S., & Sibley, L. D. (2011). Actin depolymerizing factor controls actin turnover and  
1262 gliding motility in *Toxoplasma gondii*. *Molecular Biology of the Cell*, 22(8), 1290–  
1263 1299. doi:10.1091/mbc.e10-12-0939
- 1264 Muñoz-Hernández, S., González del Carmen, M., Mondragón, M., Mercier, C., Cesbron, M. F.,  
1265 Mondragón-González, S. L., González, S., & Mondragón, R. (2011). Contribution of the  
1266 residual body in the spatial organization of *Toxoplasma gondii* tachyzoites within the  
1267 parasitophorous vacuole. *BioMed Research International*. doi:10.1155/2011/473983
- 1268 Nakagawa, S., Niimura, Y., Gojobori, T., Tanaka, H., & Miura, K. (2008). Diversity of preferred  
1269 nucleotide sequences around the translation initiation codon in eukaryote genomes.  
1270 *Nucleic Acids Research*, 36(3), 861–871. doi:10.1093/nar/gkm1102
- 1271 Ono, S. (2013). The role of cyclase-associated protein in regulating actin filament dynamics -  
1272 more than a monomer-sequestration factor. *J Cell Sci*, 126(15), 3249–3258.  
1273 doi:10.1242/jcs.128231
- 1274 Peng, D., & Tarleton, R. (2015). EuPaGDT: a web tool tailored to design CRISPR guide RNAs  
1275 for eukaryotic pathogens. *Microbial Genomics*, 1(4). doi:10.1099/mgen.0.000033

- 1276 Periz, J., Whitelaw, J., Harding, C., Gras, S., Minina, M. I. D. R., Latorre-Barragan, F.,  
1277 Lemgruber, L., Reimer, M. A., Insall, R., Heaslip, A., & Meissner, M. (2017).  
1278 *Toxoplasma gondii* F-actin forms an extensive filamentous network required for  
1279 material exchange and parasite maturation. *ELife*, 6, e24119.  
1280 doi:10.7554/eLife.24119
- 1281 Plattner, F., Yarovinsky, F., Romero, S., Didry, D., Carlier, M.-F., Sher, A., & Soldati-Favre, D.  
1282 (2008). *Toxoplasma* profilin is essential for host cell invasion and TLR11-dependent  
1283 induction of an interleukin-12 response. *Cell Host & Microbe*, 3(2), 77–87.  
1284 doi:10.1016/j.chom.2008.01.001
- 1285 Pospich, S., Kumpula, E.-P., Ecken, J. von der, Vahokoski, J., Kursula, I., & Raunser, S. (2017).  
1286 Near-atomic structure of jasplakinolide-stabilized malaria parasite F-actin reveals the  
1287 structural basis of filament instability. *Proceedings of the National Academy of*  
1288 *Sciences*, 114(40), 201707506. doi:10.1073/pnas.1707506114
- 1289 Puhka, M., Joensuu, M., Vihinen, H., Belevich, I., & Jokitalo, E. (2012). Progressive sheet-to-  
1290 tubule transformation is a general mechanism for endoplasmic reticulum partitioning  
1291 in dividing mammalian cells. *Molecular Biology of the Cell*, 23(13), 2424–2432.  
1292 doi:10.1091/mbc.E10-12-0950
- 1293 Reese, M. L., Zeiner, G. M., Saeij, J. P. J., Boothroyd, J. C., & Boyle, J. P. (2011). Polymorphic  
1294 family of injected pseudokinases is paramount in *Toxoplasma* virulence. *Proceedings*  
1295 *of the National Academy of Sciences of the United States of America*, 108(23), 9625–  
1296 9630. doi:10.1073/pnas.1015980108
- 1297 Rommereim, L. M., Bellini, V., Fox, B. A., Pètre, G., Rak, C., Touquet, B., Aldebert, D.,  
1298 Dubremetz, J.-F., Cesbron-Delauw, M.-F., Mercier, C., & Bzik, D. J. (2016). Phenotypes

- 1299 associated with knockouts of eight dense granule gene loci (GRA2-9) in virulent  
1300 *Toxoplasma gondii*. *PLOS ONE*, 11(7), e0159306. doi:10.1371/journal.pone.0159306
- 1301 Sahoo, N., Beatty, W., Heuser, J., Sept, D., & Sibley, L. D. (2006). Unusual kinetic and  
1302 structural properties control rapid assembly and turnover of actin in the parasite  
1303 *Toxoplasma gondii*. *Mol Biol Cell*, 17(2), 895–906. doi:10.1091/mbc.E05-06-0512
- 1304 Salamun, J., Kallio, J. P., Daher, W., Soldati-Favre, D., & Kursula, I. (2014). Structure of  
1305 *Toxoplasma gondii* coronin, an actin-binding protein that relocalizes to the posterior  
1306 pole of invasive parasites and contributes to invasion and egress. *The FASEB Journal*,  
1307 28(11), 4729–4747. doi:10.1096/fj.14-252569
- 1308 Sato, Y., Hliscs, M., Dunst, J., Goosmann, C., Brinkmann, V., Montagna, G. N., &  
1309 Matuschewski, K. (2016). Comparative *Plasmodium* gene overexpression reveals  
1310 distinct perturbation of sporozoite transmission by profilin. *Molecular Biology of the*  
1311 *Cell*, 27(14), 2234–2244. doi:10.1091/mbc.E15-10-0734
- 1312 Schroeder, L. K., Barentine, A. E. S., Merta, H., Schweighofer, S., Zhang, Y., Baddeley, D.,  
1313 Bewersdorf, J., & Bahmanyar, S. (2019). Dynamic nanoscale morphology of the ER  
1314 surveyed by STED microscopy. *The Journal of Cell Biology*, 218(1), 83–96.  
1315 doi:10.1083/jcb.201809107
- 1316 Seeber, F. (1997). Consensus sequence of translational initiation sites from *Toxoplasma*  
1317 *gondii* genes. *Parasitology Research*, 83(3), 309–311. doi:10.1007/s004360050254
- 1318 Shaw, M. K., & Tilney, L. G. (1999). Induction of an acrosomal process in *Toxoplasma gondii*:  
1319 Visualization of actin filaments in a protozoan parasite. *Proceedings of the National*  
1320 *Academy of Sciences of the United States of America*, 96(16), 9095–9099.  
1321 doi:10.1073/pnas.96.16.9095

- 1322 Sheffield, H. G., & Melton, M. L. (1968). The fine structure and reproduction of *Toxoplasma*  
1323 *gondii*. *The Journal of Parasitology*, 54(2), 209–226. doi:10.2307/3276925
- 1324 Shen, B., Brown, K. M., Lee, T. D., & Sibley, L. D. (2014). Efficient gene disruption in diverse  
1325 strains of *Toxoplasma gondii* using CRISPR/CAS9. *MBio*, 5(3).  
1326 doi:10.1128/mBio.01114-14
- 1327 Silva, D. A. O., Lobato, J., Mineo, T. W. P., & Mineo, J. R. (2007). Evaluation of serological  
1328 tests for the diagnosis of *Neospora caninum* infection in dogs: Optimization of cut off  
1329 titers and inhibition studies of cross-reactivity with *Toxoplasma gondii*. *Veterinary*  
1330 *Parasitology*, 143(3), 234–244. doi:10.1016/j.vetpar.2006.08.028
- 1331 Skillman, K. M., Diraviyam, K., Khan, A., Tang, K., Sept, D., & Sibley, L. D. (2011).  
1332 Evolutionarily divergent, unstable filamentous actin is essential for gliding motility in  
1333 apicomplexan parasites. *PLoS Pathogens*, 7(10), e1002280.  
1334 doi:10.1371/journal.ppat.1002280
- 1335 Swapna, L. S., & Parkinson, J. (2017). Genomics of apicomplexan parasites. *Critical Reviews in*  
1336 *Biochemistry and Molecular Biology*, 52(3), 254–273.  
1337 doi:10.1080/10409238.2017.1290043
- 1338 Tomavo, S., Slomianny, C., Meissner, M., & Carruthers, V. B. (2013). Protein trafficking  
1339 through the endosomal system prepares intracellular parasites for a home invasion.  
1340 *PLoS Pathogens*, 9(10). doi:10.1371/journal.ppat.1003629
- 1341 Tosetti, N., Dos Santos Pacheco, N., Soldati-Favre, D., & Jacot, D. (2019). Three F-actin  
1342 assembly centers regulate organelle inheritance, cell-cell communication and motility  
1343 in *Toxoplasma gondii*. *ELife*, 8. doi:10.7554/eLife.42669
- 1344 Treeck, M., Sanders, J. L., Gaji, R. Y., LaFavers, K. A., Child, M. A., Arrizabalaga, G., Elias, J. E.,  
1345 & Boothroyd, J. C. (2014). The calcium-dependent protein kinase 3 of *Toxoplasma*

1346 influences basal calcium levels and functions beyond egress as revealed by  
1347 quantitative phosphoproteome analysis. *PLoS Pathog*, 10(6), e1004197.  
1348 doi:10.1371/journal.ppat.1004197

1349 Vaishnava, S., & Striepen, B. (2006). The cell biology of secondary endosymbiosis – how  
1350 parasites build, divide and segregate the apicoplast. *Molecular Microbiology*, 61(6),  
1351 1380–1387. doi:10.1111/j.1365-2958.2006.05343.x

1352 West, M., Zurek, N., Hoenger, A., & Voeltz, G. K. (2011). A 3D analysis of yeast ER structure  
1353 reveals how ER domains are organized by membrane curvature. *The Journal of Cell*  
1354 *Biology*, 193(2), 333–346. doi:10.1083/jcb.201011039

1355 Whitelaw, J. A., Latorre-Barragan, F., Gras, S., Pall, G. S., Leung, J. M., Heaslip, A., Egarter, S.,  
1356 Andenmatten, N., Nelson, S. R., Warshaw, D. M., Ward, G. E., & Meissner, M. (2017).  
1357 Surface attachment, promoted by the actomyosin system of *Toxoplasma gondii* is  
1358 important for efficient gliding motility and invasion. *BMC Biology*, 15(1).  
1359 doi:10.1186/s12915-016-0343-5

1360  
1361  
1362  
1363  
1364  
1365  
1366  
1367  
1368  
1369  
1370  
1371  
1372  
1373  
1374  
1375  
1376  
1377  
1378  
1379  
1380  
1381

1382  
1383  
1384  
1385  
1386  
1387  
1388  
1389  
1390  
1391  
1392  
1393  
1394  
1395  
1396  
1397  
1398  
1399  
1400  
1401  
1402  
1403  
1404  
1405  
1406  
1407  
1408  
1409  
1410  
1411  
1412  
1413  
1414  
1415  
1416  
1417  
1418  
1419  
1420  
1421  
1422  
1423  
1424  
1425  
1426  
1427  
1428  
1429  
1430  
1431  
1432  
1433  
1434  
1435  
1436

## Figure legends

### Figure 1: Alternative translational start sites lead to the generation of two different CAP isoforms.

(A) Sequence alignment of the first 57 amino acid residues of TgCAP with that of other Apicomplexa. Green shading indicates cysteines which are putative palmitoylation sites, yellow shading indicates methionines which are putative alternative translational start sites. (B) Subcellular localisation of a CAP-GFP fusion. Scale bar, 2  $\mu$ m. (C) Subcellular localisation of CAP by immunofluorescence assay (IFA) using rabbit anti-TgCAP antibodies. Scale bar, 2  $\mu$ m. (D) Western blot of CAP expression levels over the first 24 hours following host cell invasion using anti-TgCAP antibodies. Anti-*Toxoplasma* antibodies were used as a loading control. (E) Alignment of the *Toxoplasma* consensus translation initiation (Kozak) sequence (Seeber, 1997) with the translation initiation sequences of CAP's first (M1) and second (M37) putative translational start sites. Green shading indicates bases that correspond to the Kozak sequence. (F) Schematic of TgCAP with annotations for the two putative CAP isoforms and the mutation experiments performed to test their expression: Mutation of M1 to leucine (L) to produce shortCAP, and mutation of M37 to L producing longCAP. Green diamonds indicate putative palmitoylation sites. (G) IFA and (H) western blot of ectopic HA-tagged TgCAP isoforms and cysteine mutants (C6 and C8). Inclusion of a HA-tag makes the protein run more slowly than the untagged protein. Anti-*Toxoplasma* antibodies were used as a loading control in (H). Scale bar in (G), 5  $\mu$ m.

### Figure 2: A second generation RH $\Delta ku80$ DiCre\_T2A parasite strain stably expresses DiCre.

(A) Schematic of the DiCre\_T2A expression construct. The chloramphenicol resistance cassette (CAT) is flanked by T2A skip peptides. The two Cre subunits (FRB\_Cre2 and FKBP\_Cre1) are located on either side of the T2A::CAT::T2A cassette. The fusion protein is driven by the alpha-tubulin promoter with a SAG1 3' UTR. The red hexagon indicates the position of the stop-codon. (B) Flow cytometry analysis to determine excision efficiency of the RH DiCre\_T2A  $\Delta ku80$  line following 65 days of frequent extracellular stress. Excision is determined by a shift from Killer Red<sup>(+)</sup> to Killer Red<sup>(-)</sup> and YFP<sup>(+)</sup> expression. Parasites were analysed 22 h after induction with 50 nM rapamycin (RAP) for 4 h. Due to analysing 22 h after induction of excision, parasites still have residual KillerRed signal. (C) Table summarizing the excision efficiency of RAP treated RH DiCre\_T2A  $\Delta ku80$  parasites over time in the presence or absence of chloramphenicol selection. "Day" refers to the number of days in cell culture while "rep" corresponds to biological replicates.

### Figure 3: Generation of CAP conditional knockout and complementation strains

(A) Schematic of the CAP conditional knock out strategy using double homologous integration. The position of the 5' LoxP site in the CAP promoter is indicated as well as the predicted sizes of the PCR amplicons. (B) Agarose gel showing the expected PCR products for correct integration at the endogenous locus. (C) IFA 46 hr after treatment with DMSO or 50 nM rapamycin for 4 h. Scale bar, 5  $\mu$ m. (D) Western blot showing absence of CAP protein in the cloned  $\Delta$ CAP parasites using anti-TgCAP antibodies. Anti-*Toxoplasma* antibodies were used as a loading control. (E) Subcellular localisation and (F) Western blot of ectopic HA-tagged TgCAP isoforms, in the  $\Delta$ CAP background. Inclusion of a HA-tag makes the protein run more slowly than the untagged protein. IFA images have been individually contrast adjusted to aid in visualising protein localisation. Scale bar in (E), 5  $\mu$ m. Anti-*Toxoplasma* antibodies were used as a loading control in (F).

### Figure 4: CAP plays an important but not essential role during the lytic cycle in cell culture



1437 **(A)** Overview of the flow cytometry competition assay (left). Competition assays of mCherry-  
1438 expressing  $\Delta$ CAP and CAP complementation lines with non-fluorescent WT-complemented  
1439 parasites (right). The ratio of mCherry<sup>(+)</sup> to mCherry<sup>(-)</sup> parasites was analysed by flow cytometry  
1440 at day 0, 15 and 30. Data are represented as mean  $\pm$  s.d. (D0 and D30,  $n=6$ . D15,  $n=4$ ). Two-  
1441 way ANOVA followed by a multiple comparison Sidak's test was used to compare means  
1442 between time points. **(B)** 3D Matrigel-based motility assays performed in the absence of  
1443 inducers of motility. Results are expressed as mean  $\pm$  s.d. ( $n=4$ ). Each data point corresponds  
1444 to a single technical replicate from one of four independent biological replicates, on which  
1445 significance was assessed using an unpaired  $t$ -test. **(C)** Invasion assay comparing  $\Delta$ CAP to  
1446 the complemented lines. Data are represented as mean  $\pm$  s.d. ( $n=3$ ). One-way ANOVA  
1447 followed by Dunnett's test was used to compare means to the  $\Delta$ CAP<sup>CAP</sup> mean **(D)** Egress  
1448 assay. Graph shows number of egressed vacuoles in response to BIPPO over time. Data are  
1449 represented as mean  $\pm$  s.d. ( $n=3$ ). Two-way ANOVA followed by Dunnett's test was used to  
1450 compare means to the  $\Delta$ CAP<sup>CAP</sup> mean. Stated significance is in comparison to  $\Delta$ CAP<sup>CAP</sup>. **(E)**  
1451 Dense granule trafficking assay.  $\Delta$ CAP and CAP complemented lines were transiently  
1452 transfected with SAG1 $\Delta$ GPI-mCherry that allows visualisation of dense granules. The length  
1453 and speed of directed runs were recorded using fluorescence microscopy and analysed using  
1454 ImageJ. Data are represented as mean  $\pm$  s.d. ( $n=3$ ). One-way ANOVA followed by Dunnett's  
1455 test was used to compare means to the  $\Delta$ CAP<sup>CAP</sup> mean.

1456

#### 1457 **Figure 5: CAP is important for rosetting and rapid cell-cell communication**

1458 **(A)** Representative fluorescence images of mCherry expressing  $\Delta$ CAP parasites and  
1459 complemented isoforms (left). Quantification of rosetting vs. non-rosetting parasites (right).  
1460 Data are represented as mean  $\pm$  s.d. ( $n=2$ ). One-way ANOVA followed by Dunnett's test was  
1461 used to compare means to the  $\Delta$ CAP<sup>CAP</sup> mean. **(B-E)** FRAP experiments to measure transfer  
1462 of mCherry between individual parasites in a vacuole. **(B)** Heatmaps showing the percentage  
1463 change in fluorescence of individual parasites in **(i)** CAP complemented, **(ii)**  $\Delta$ CAP and **(iii)**  
1464  $\Delta$ gra2 parasite lines. A recovery plot and image for representative vacuoles are included.  
1465 Regions of interest are numbered; the bleached parasite is "1". Numbers are allocated based  
1466 on proximity to the bleached parasite. The yellow lightning bolt indicates which parasite was  
1467 photobleached. Data are representative of two independent experiments. **(C, D)** Graphs  
1468 quantifying the type (C) and amount (D) of recovery for all parasite lines. Data are represented  
1469 as mean  $\pm$  s.d. ( $\Delta$ CAP and  $\Delta$ CAP<sup>CAP</sup>  $n=4$ , all other lines,  $n=2$ ). Statistical significance was  
1470 assessed by either Chi-square test (D) or one-way ANOVA followed by Dunnett's test to  
1471 compare means to the  $\Delta$ CAP<sup>CAP</sup> mean (C). **(E)** FRAP analysis of  $\Delta$ CAP parasites. The images  
1472 and graphs represent sequential photobleaching and recovery measurements of individual  
1473 parasites within the vacuole. The yellow lightning bolt indicates which parasite was  
1474 photobleached. The white arrow identifies the parasite from which the majority of recovery was  
1475 observed. All scale bars, 5  $\mu$ m.

1476

#### 1477 **Figure 6: CAP is important for daughter cell orientation, but not synchronous division**

1478 **(A)** Parasites stained with anti-IMC 3 antibodies to visualise daughter cell orientation and  
1479 division. Scale bar, 5  $\mu$ m. **(B)** Quantification of synchronicity of division in parasite vacuoles  
1480 using daughter cell staining from (A) reveals no defect in the synchronicity of  $\Delta$ CAP parasites.  
1481 Data are represented as mean  $\pm$  s.d. ( $n=3$ ). Significance was assessed using an unpaired two-  
1482 tailed  $t$ -test. **(C)** Quantification of daughter cell orientation in parasite vacuoles reveals a  
1483 significant defect in the daughter cell orientation of  $\Delta$ CAP parasites. Data are represented as  
1484 mean  $\pm$  s.d. ( $n=3$ ). One-way ANOVA followed by Dunnett's test was used to compare means  
1485 to the  $\Delta$ CAP<sup>CAP</sup> mean.

1486

#### 1487 **Figure 7: CAP KO parasites are still connected by a decentralised residual body**

1488 **(A)** FRAP analysis of  $\Delta$ CAP<sup>CAP</sup> parasites. The images and graphs represent sequential  
1489 photobleaching and recovery measurements of individual parasites within the vacuole. **(B) (i)**

1490 FIB SEM of the vacuole from (A) with a 3D model highlighting the residual body (green skeleton  
1491 representing how the approximate centre can be traced through to the basal poles) and  
1492 parasite openings at the basal pole (orange ring). Note that the illustrated connections display  
1493 the distance between the parasite's posterior ends, and do not represent tubular connections  
1494 between them. Numbering of parasites is consistent with (A). (ii) Zoomed image of the residual  
1495 body from (i), (iii) zoomed image of the residual body from (i) overlaid with the 3D model. (C)  
1496 FRAP analysis of  $\Delta$ CAP parasites. The images and graphs represent sequential  
1497 photobleaching and recovery measurements of individual parasites within the vacuole. (D) (i)  
1498 FIB SEM of the vacuole from (A), numbering of parasites is consistent with (C). (ii) Zoomed  
1499 image of the boxed region from (i). Green arrows indicate the residual body (left panel). A 3D  
1500 model highlights the residual body (green skeleton drawn through the lumen of the connections  
1501 between parasites), parasite openings at the basal pole (orange ring) (right panel). (iii) A 3D  
1502 model of selected features in the vacuole from (C), highlighting the residual body (green),  
1503 parasite openings at the basal pole (orange ring) and coarse segmentation of two of the  
1504 parasites (yellow) (left panel). This model is shown with an orthoslice from the FIB SEM volume  
1505 (right panel). (E) Zoomed images of the boxed region from (Di). Blue arrows indicate a putative  
1506 ER structure (left). A 3D model highlights this putative ER (blue) and parasite openings at the  
1507 basal pole (orange ring) (right). (i) View facing a Z orthoslice. (ii) View facing an X orthoslice.  
1508 The yellow lightning bolt indicates which parasite was photobleached and the white arrow  
1509 identifies the parasite from which recovery was observed (A,C). Scale bar, 5  $\mu$ m (A, C) or 1  
1510  $\mu$ m (B, D, E).

1511  
1512 **Figure 8: CAP is essential for virulence in type II but not type I parasites.**

1513 (A) Survival rates of C57BL/6 mice infected with 25 RH  $\Delta$ CAP<sup>CAP</sup> or RH  $\Delta$ CAP parasites. (B)  
1514 Survival rates of C57BL/6 mice infected with 50,000 Pru  $\Delta$ CAP parasites or with  
1515 complementing CAP variants. (C) ELISA testing sera reactivity of naïve or *Toxoplasma*  
1516 infected mice using *Toxoplasma* antigen. (D) Cyst burden in the brain of C57BL/6 mice 32 days  
1517 post-infection with 5,000 Pru  $\Delta$ CAP parasites or with complementing CAP variants. For all  
1518 experiments, five animals were infected for each strain.

1519  
1520 **Supplementary Figure 1. Endogenous tagging of CAP**

1521 (A) Schematic of CAP endogenous tagging strategy. Arrowhead indicates CRISPR/CAS9 cut  
1522 site. (B) IFA of the resulting HA-tagged line. Scale bar, 2  $\mu$ m.

1523  
1524 **Supplementary Figure 2. Excision efficiency testing of RH DiCre  $\Delta$ ku80 $\Delta$ hxgprt**

1525 Flow cytometry analysis to determine excision efficiency of the original RH DiCre  
1526  $\Delta$ ku80 $\Delta$ hxgprt line following 65 days of standard, non-stressing, culture conditions. Excision is  
1527 determined by a shift from Killer Red<sup>(+)</sup> to Killer Red<sup>(-)</sup> and YFP<sup>(+)</sup> expression. Parasites were  
1528 analysed 22 h after induction with 50 nM rapamycin (RAP) for 4 h. Due to analysing 22 h after  
1529 induction of excision, parasites still have residual KillerRed signal.

1530  
1531 **Supplementary Figure 3. Excision testing of the CAP conditional knockout lines**

1532 (A) Schematic of the CAP locus in the LoxPCAP conditional knockout lines. Rapamycin  
1533 induced excision of CAP is detected by PCR3. (B) Diagnostic PCR of the CAP locus in the (i)  
1534 LoxPCAP lines 5 d after treatment with either DMSO (D) or rapamycin (R). (ii) Excised clones  
1535 were subsequently obtained from these rapamycin treated populations.

1536  
1537 **Supplementary Figure 4. CAP-HA expression in the  $\Delta$ CAP<sup>CAP</sup> line**

1538 Western blot on CAP expression levels in the  $\Delta$ CAP<sup>CAP</sup> strain over the first 24 hours following  
1539 host cell invasion using anti-TgCAP antibodies. Anti-*Toxoplasma* antibodies were used as a  
1540 loading control.

1541  
1542 **Supplementary Figure 5. Replication analysis of  $\Delta$ CAP and the complemented lines.**

1543 Data are represented as mean  $\pm$  s.d. ( $n=2$ ). One-way ANOVA followed by Dunnett's test was  
1544 used to compare means to the  $\Delta$ CAP<sup>CAP</sup> mean. "Other" refers to vacuoles with a non-power of  
1545 2 number of parasites.

1546  
1547 **Supplementary Figure 6. 3D Matrigel-based motility assays performed in the absence**  
1548 **of inducers of motility.**

1549 Results are expressed as mean  $\pm$  s.d. ( $n=4$ ). Each data point corresponds to a single technical  
1550 replicate from one of four independent biological replicates, on which significance was  
1551 assessed using an unpaired *t*-test.

1552  
1553 **Supplementary Figure 7. Scanning electron micrographs of intracellular  $\Delta$ CAP and**  
1554 **complemented lines**

1555 Vacuole organisation is disrupted in  $\Delta$ CAP and  $\Delta$ CAP<sup>longCAP</sup> parasite strains.

1556  
1557 **Supplementary Figure 8. Apicoplast segregation analysis**

1558 Apicoplast segregation was not affected in the  $\Delta$ CAP line. Representative IFA images (left)  
1559 and quantification of apicoplast segregation (right). Data are represented as mean  $\pm$  s.d. ( $n=3$ ).  
1560 Significance was assessed using an unpaired two-tailed *t*-test. Scale bar, 5  $\mu$ m.

1561  
1562 **Supplementary Figure 9. Close up FIB SEM images of parasite connections in the  $\Delta$ CAP**  
1563 **vacuole from (Fig. 7C-E)**

1564 The 3D model highlights the residual body (green skeleton representing how the approximate  
1565 centre can be traced through to the basal poles), parasite openings at the basal pole (orange  
1566 ring) and coarse segmentation of two of the parasites (yellow). Scale bars are not shown since  
1567 these are oblique views – see Fig. 7 and Methods for scale information.

1568  
1569 **Video 1. Live egress imaging of a  $\Delta$ CAP<sup>CAP</sup> vacuole**  
1570 Egress was induced by addition of 50  $\mu$ M BIPPO at 0 s. Image taken every 1.8 s. The video is  
1571 played at 6.6 fps and the time is indicated in seconds. Scale bar, 10  $\mu$ m.

1572  
1573 **Video 2. Live egress imaging of a  $\Delta$ CAP vacuole**  
1574 Egress was induced by addition of 50  $\mu$ M BIPPO at 0 s. Image taken every 1.8 s. The video is  
1575 played at 6.6 fps and the time is indicated in seconds. Scale bar, 10  $\mu$ m.

1576  
1577 **Video 3. Live egress imaging of a  $\Delta$ CAP<sup>shortCAP</sup> vacuole**  
1578 Egress was induced by addition of 50  $\mu$ M BIPPO at 0 s. Image taken every 1.8 s. The video is  
1579 played at 6.6 fps and the time is indicated in seconds. Scale bar, 10  $\mu$ m.

1580  
1581 **Video 4. Live egress imaging of a  $\Delta$ CAP<sup>longCAP</sup> vacuole**  
1582 Egress was induced by addition of 50  $\mu$ M BIPPO at 0 s. Image taken every 1.8 s. The video is  
1583 played at 6.6 fps and the time is indicated in seconds. Scale bar, 10  $\mu$ m.

1584  
1585 **Video 5. FRAP on a  $\Delta$ CAP<sup>CAP</sup> vacuole**  
1586 A single parasite was photobleached at 3 s. Images taken every 1 s. The video is played at 2  
1587 fps and the time is indicated in seconds. Scale bar, 5  $\mu$ m.

1588  
1589 **Video 6. FRAP on a  $\Delta$ CAP vacuole**  
1590 A single parasite was photobleached at 3 s. Images taken every 1 s. The video is played at 2  
1591 fps and the time is indicated in seconds. Scale bar, 5  $\mu$ m.

1592  
1593 **Video 7. FRAP on a  $\Delta$ Gra2 vacuole**  
1594 A single parasite was photobleached at 3 s. Images taken every 1 s. The video is played at 2  
1595 fps and the time is indicated in seconds. Scale bar, 5  $\mu$ m.

1596

1597 **Video 8. FIB SEM of the  $\Delta$ CAP<sup>CAP</sup> vacuole from Fig. 7A-B with 3D model overlay**  
1598 All FIB SEM slices of the  $\Delta$ CAP<sup>CAP</sup> vacuole Fig. 7A-B. The 3D model highlights the residual  
1599 body (green skeleton representing how the approximate centre can be traced through to the  
1600 basal poles, along with a structure that extends from that centre but has no connection) and  
1601 parasite openings at the basal pole (orange ring). The volume of the FIB SEM dataset shown  
1602 is indicated in the Materials and methods.

1603  
1604 **Video 9. FIB SEM of the  $\Delta$ CAP vacuole from Fig. 7C-E with 3D model overlays**  
1605 All FIB SEM slices of the  $\Delta$ CAP vacuole Fig. 7C-E. The 3D model highlights the residual body  
1606 (green skeleton drawn through the approximate central axis of the lumen of the connections  
1607 between parasites), parasite openings at the basal pole (orange ring), coarse segmentation of  
1608 the central part of two of the parasites (yellow), and part of the putative ER (blue, note that only  
1609 a selected region was segmented; from the inner face of two of the basal pores through part  
1610 of the decentralised residual body). The volume of the FIB SEM dataset shown is indicated in  
1611 the Materials and methods.

1612  
1613 **Supplementary File 1. Primers listed in the Materials and methods**

1614  
1615 **Supplementary File 2. Synthetic DNA listed in the Materials and methods**

1616  
1617 **Supplementary File 3. BioWave program details for FIB SEM**

1618 **Figure 1**

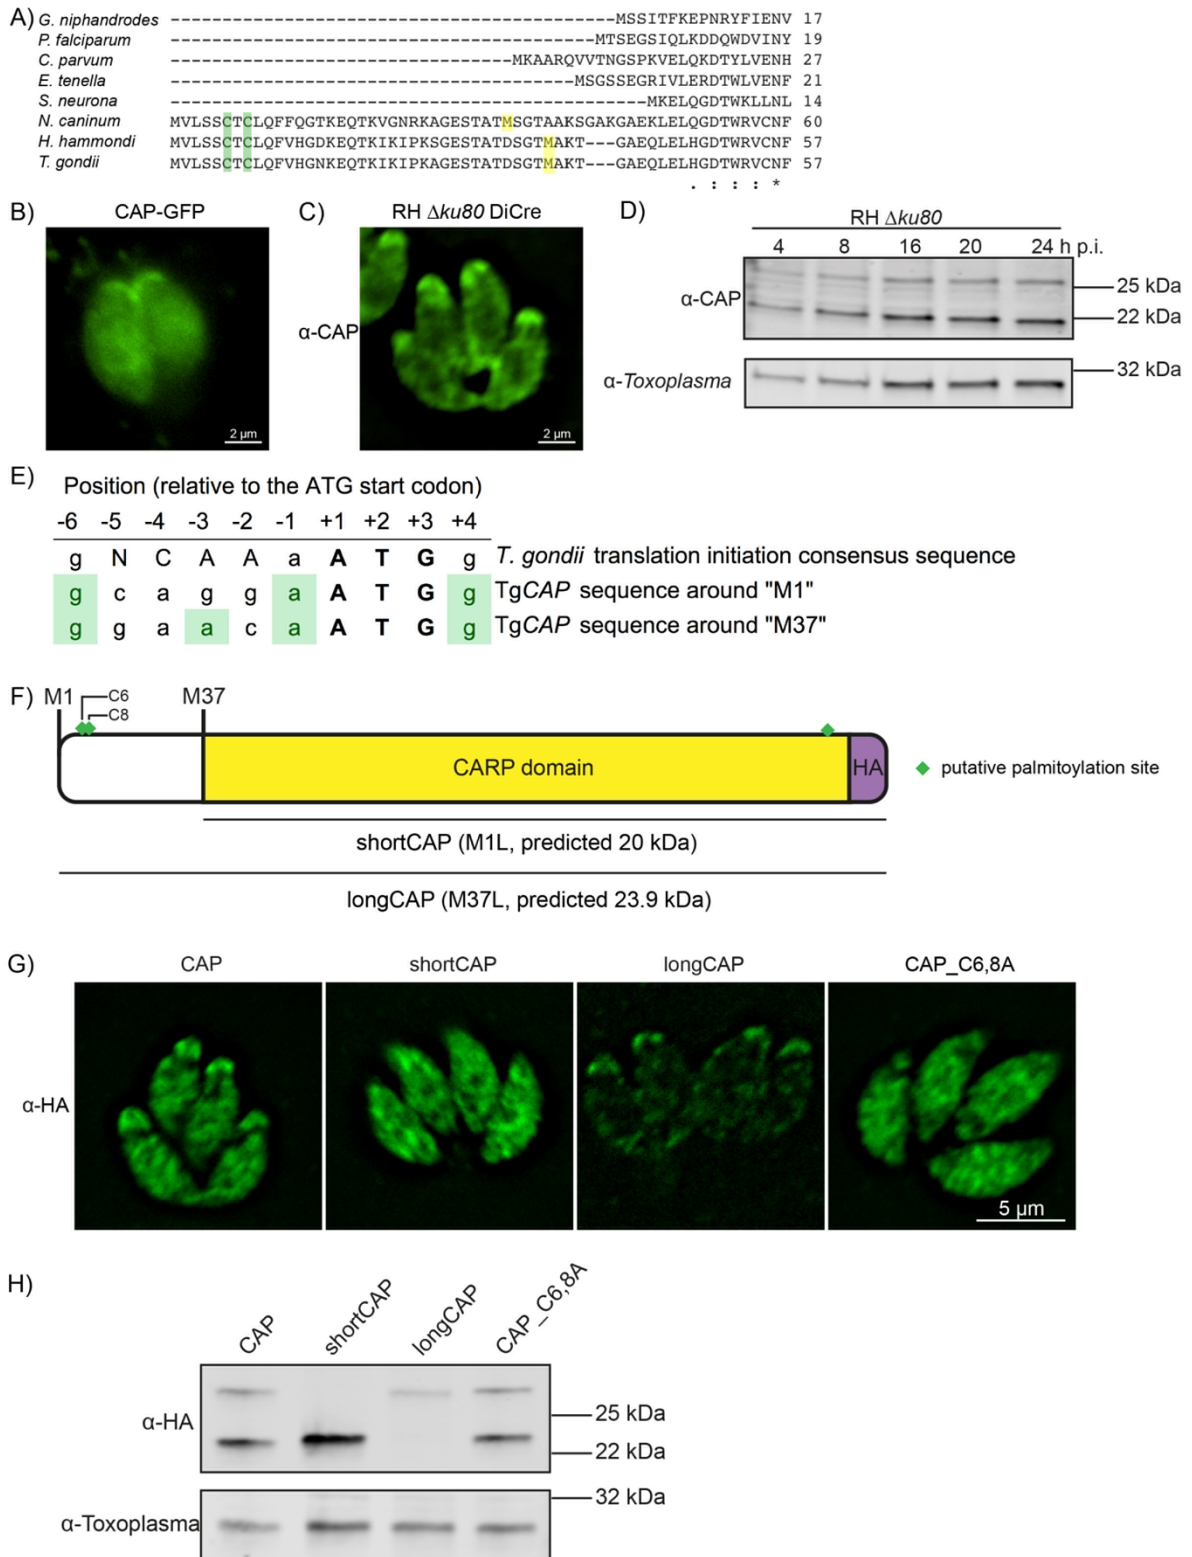

1619  
 1620  
 1621  
 1622  
 1623  
 1624

1625 **Figure 2**  
1626

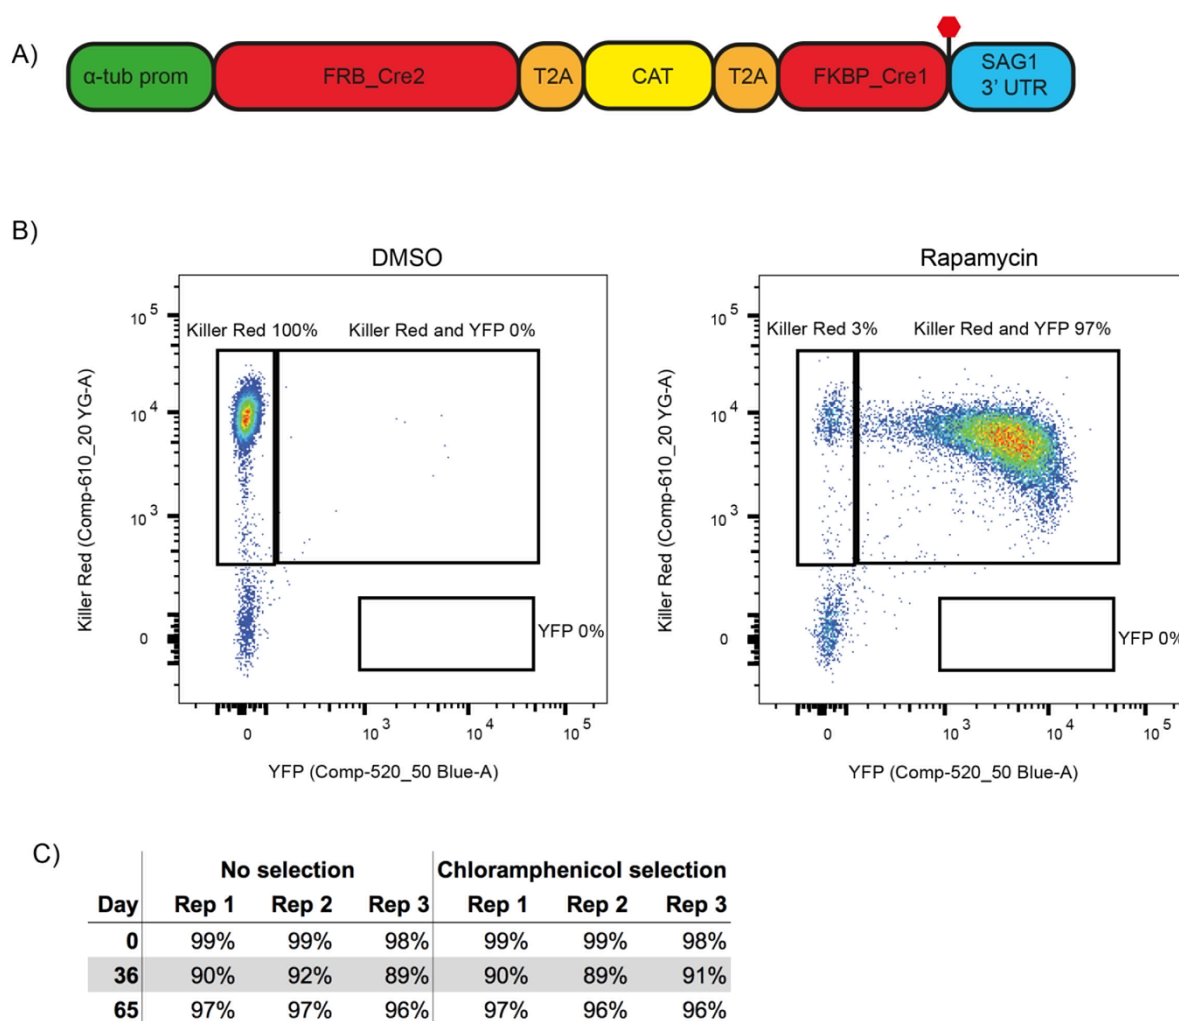

1627  
1628  
1629  
1630  
1631  
1632  
1633  
1634  
1635  
1636  
1637  
1638  
1639  
1640  
1641  
1642  
1643  
1644  
1645  
1646  
1647  
1648  
1649

1650 **Figure 3**  
1651

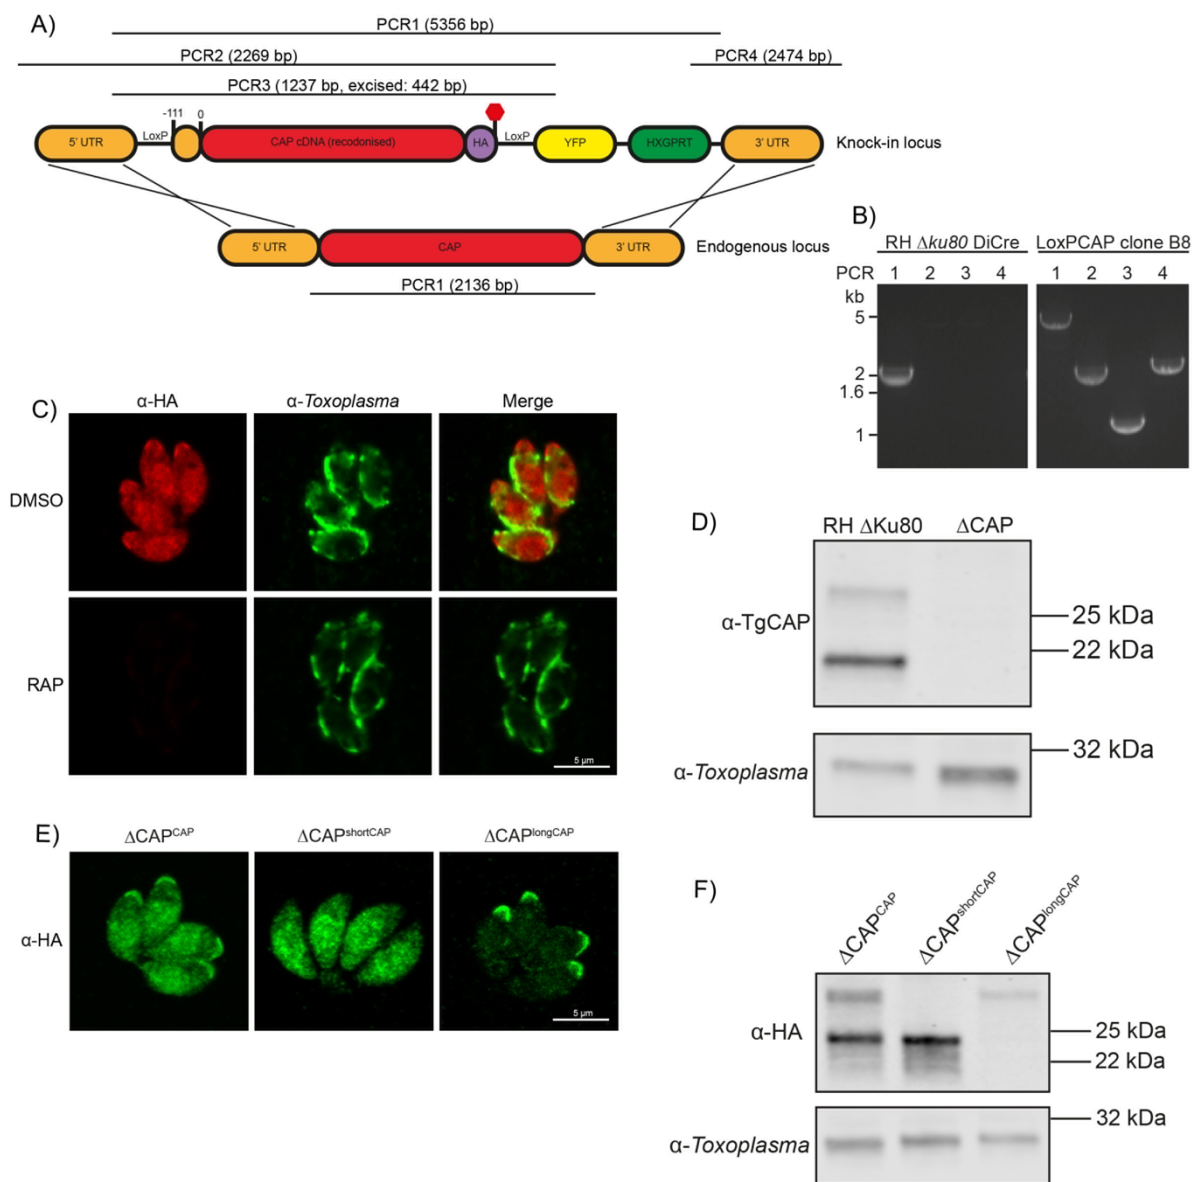

1652  
1653  
1654  
1655  
1656  
1657  
1658  
1659  
1660  
1661  
1662  
1663  
1664  
1665  
1666  
1667  
1668  
1669  
1670

1671 **Figure 4**

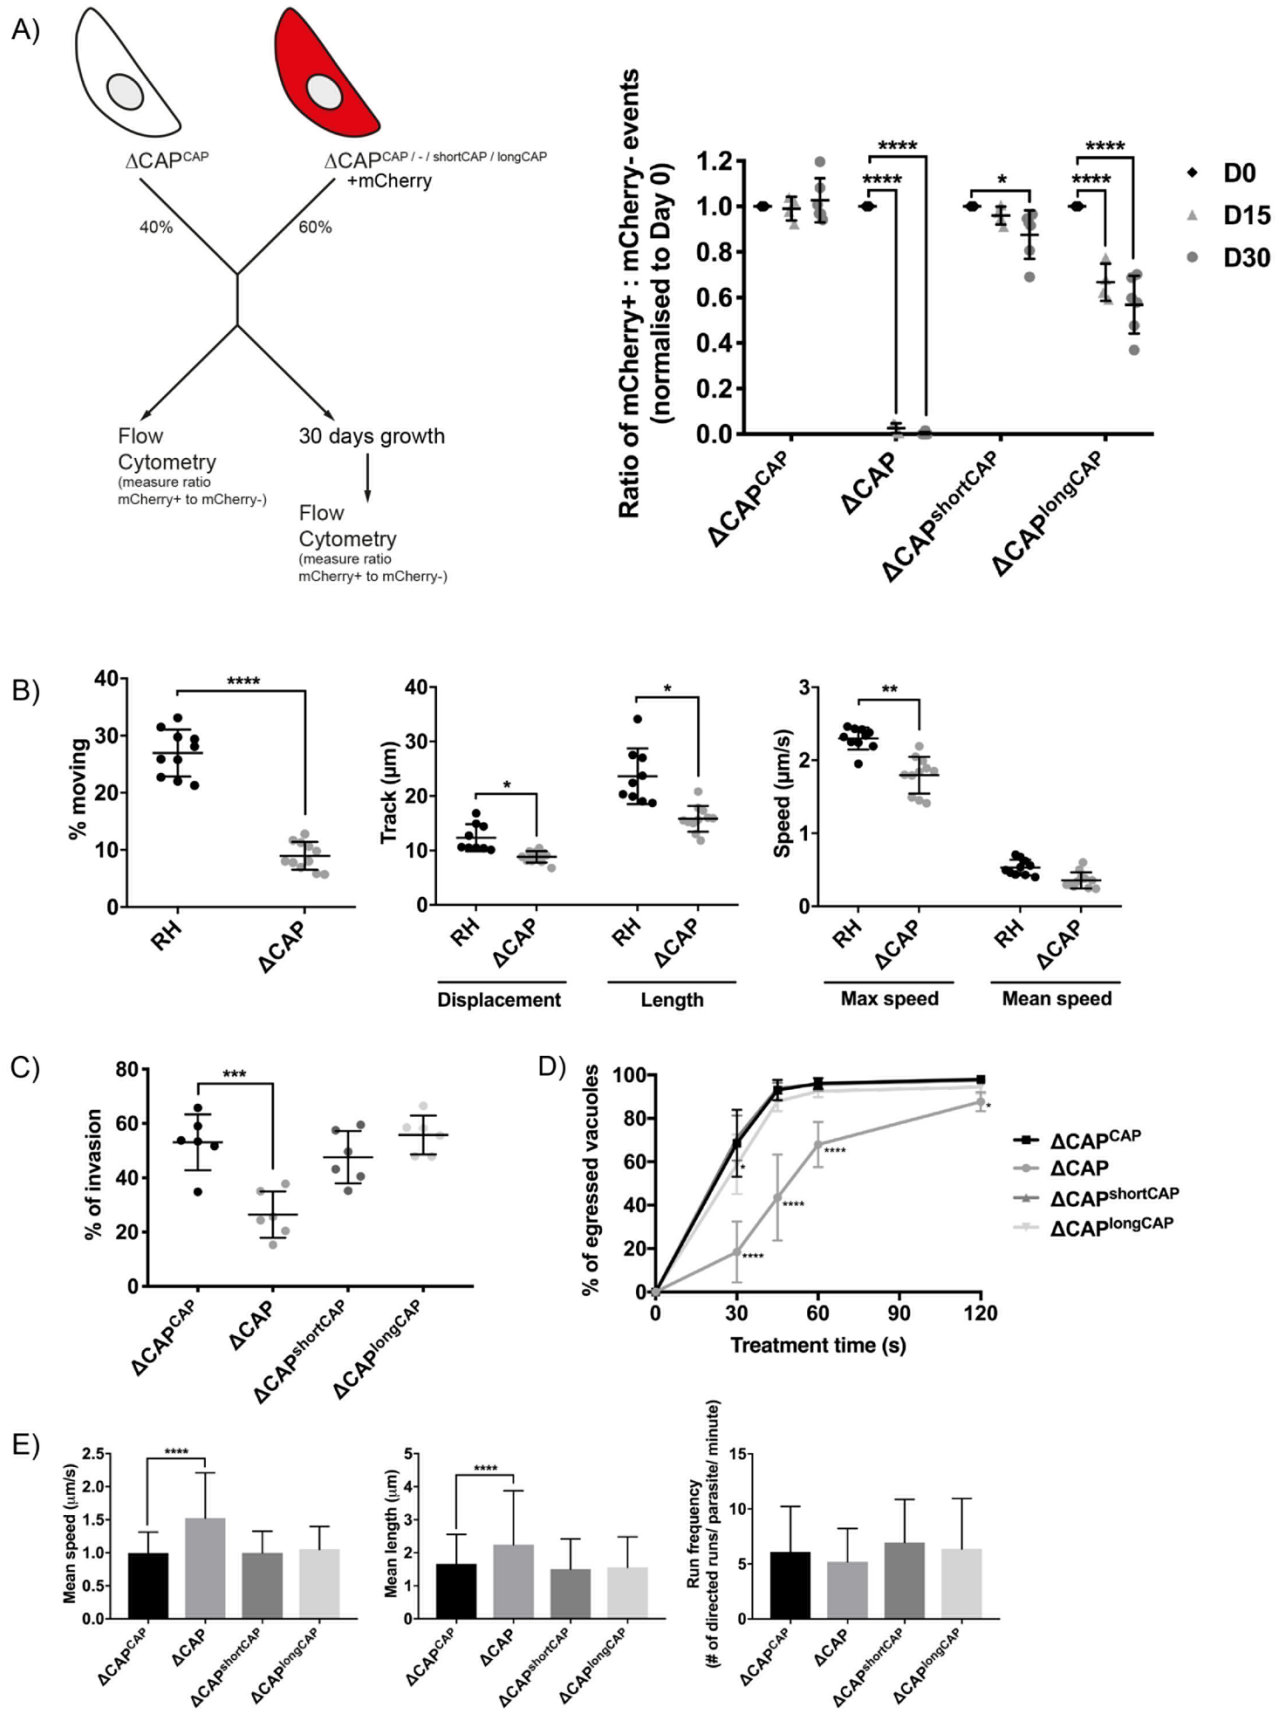

1672  
1673



1674 **Figure 5**

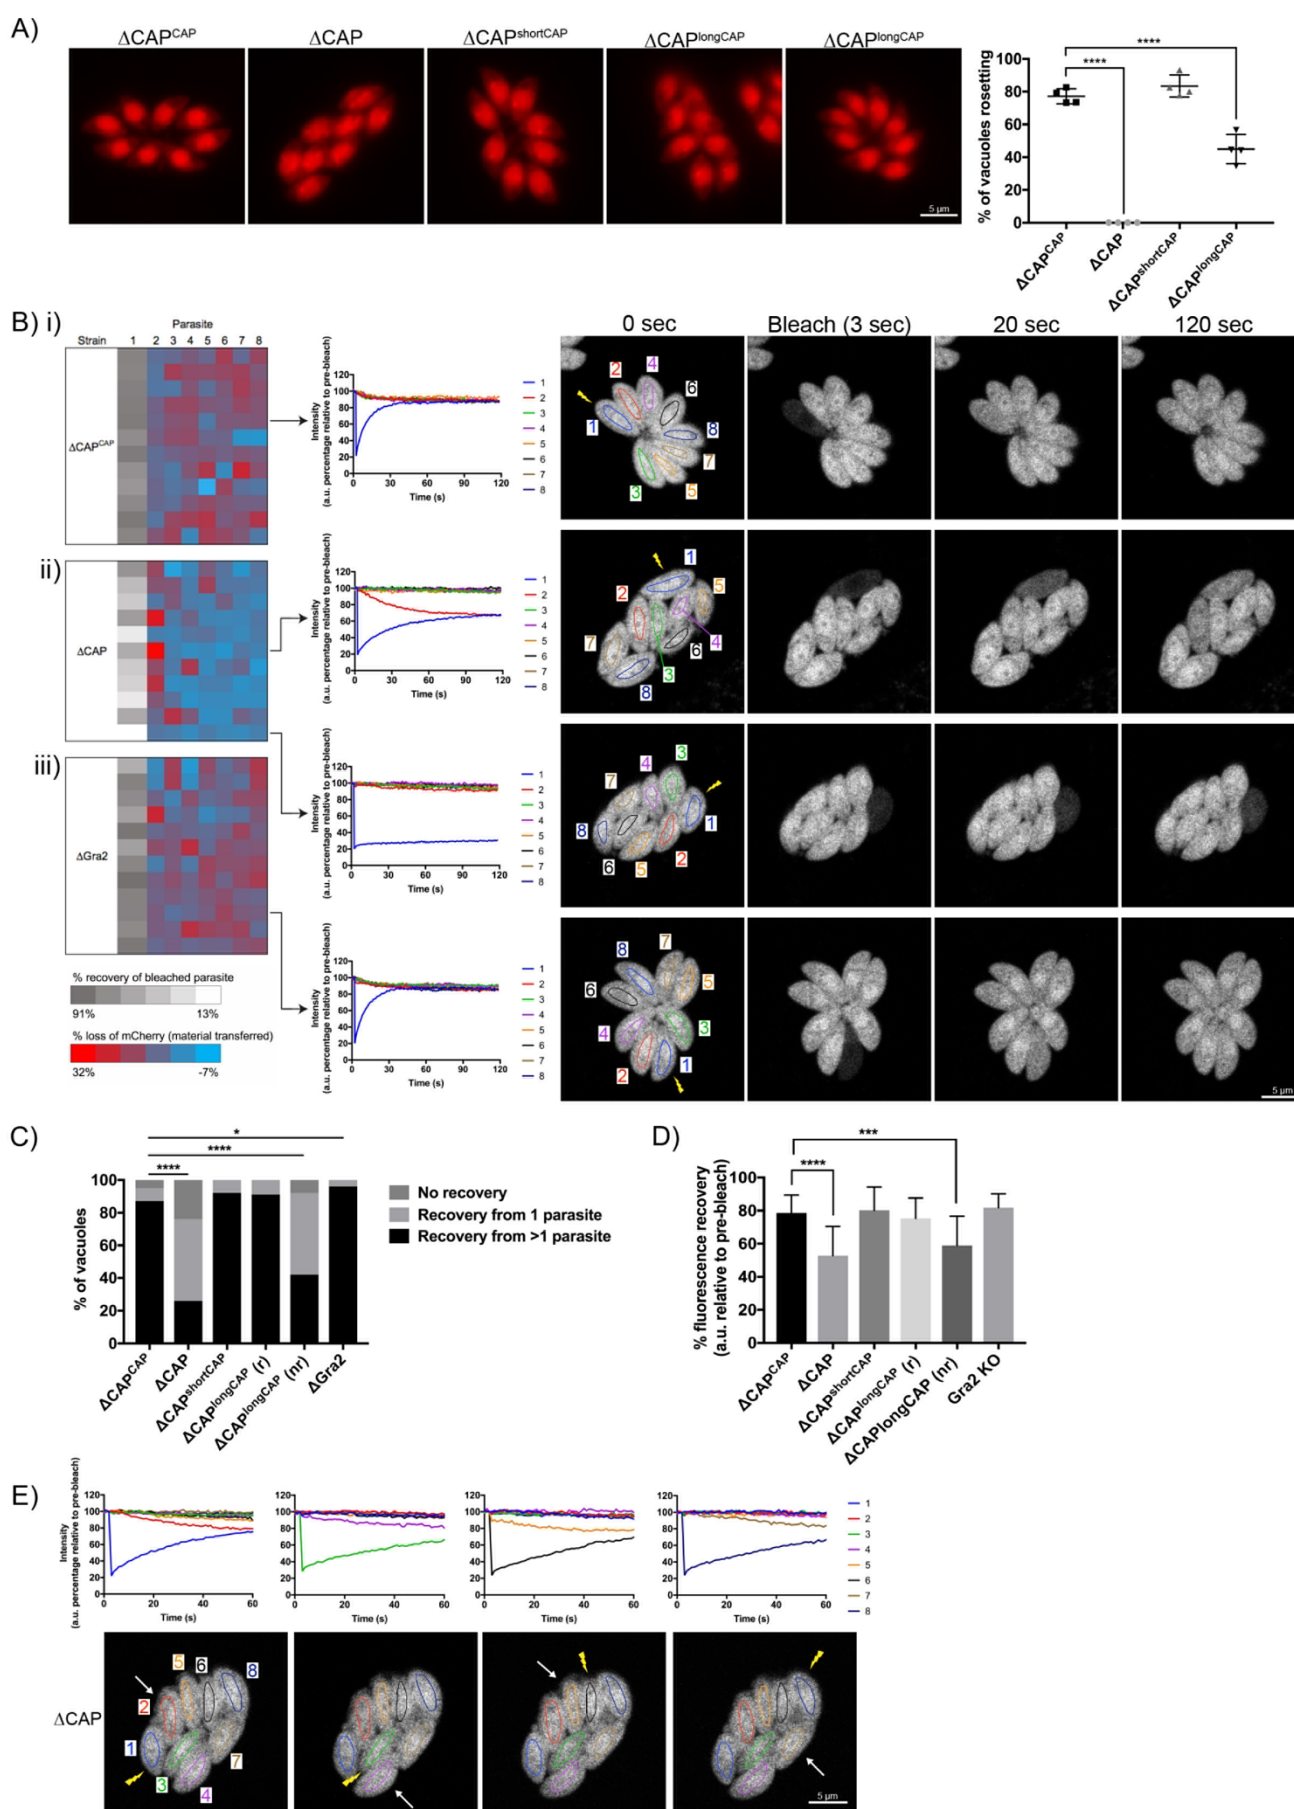

1675 **Figure 6**

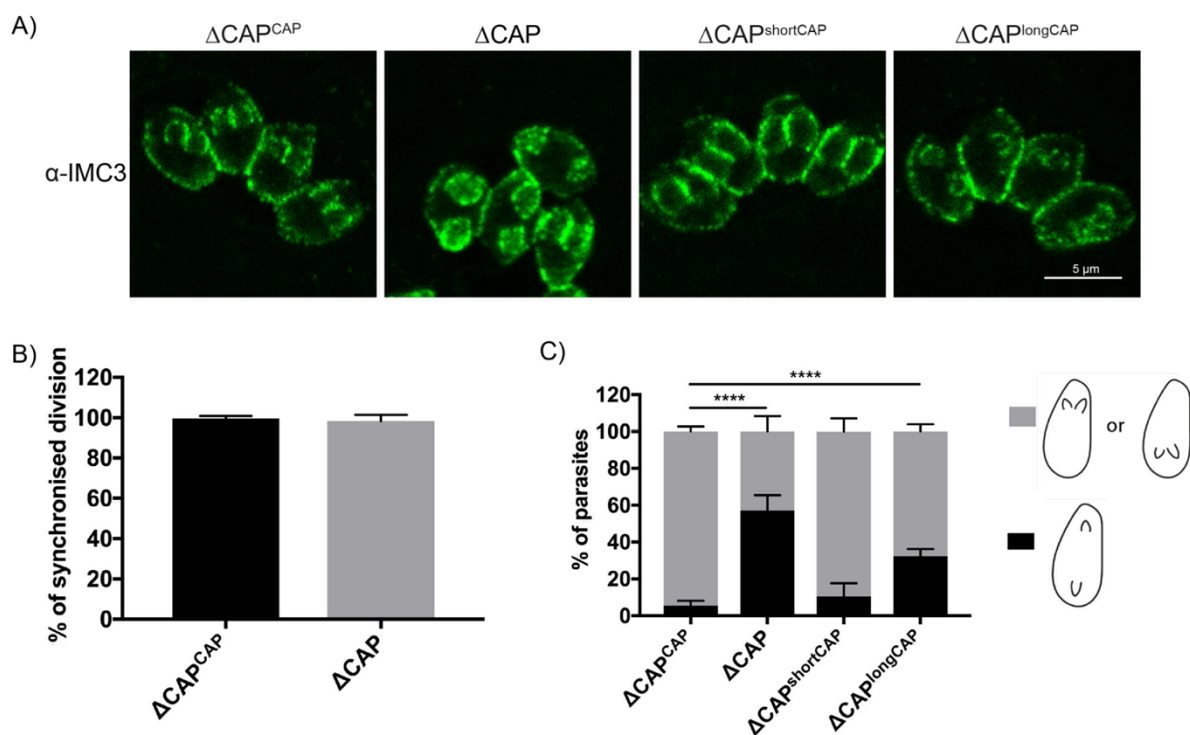

1676  
1677  
1678  
1679  
1680  
1681  
1682  
1683  
1684  
1685  
1686  
1687  
1688  
1689  
1690  
1691  
1692  
1693  
1694  
1695  
1696  
1697  
1698  
1699  
1700  
1701  
1702  
1703  
1704  
1705  
1706

1707 **Figure 7**

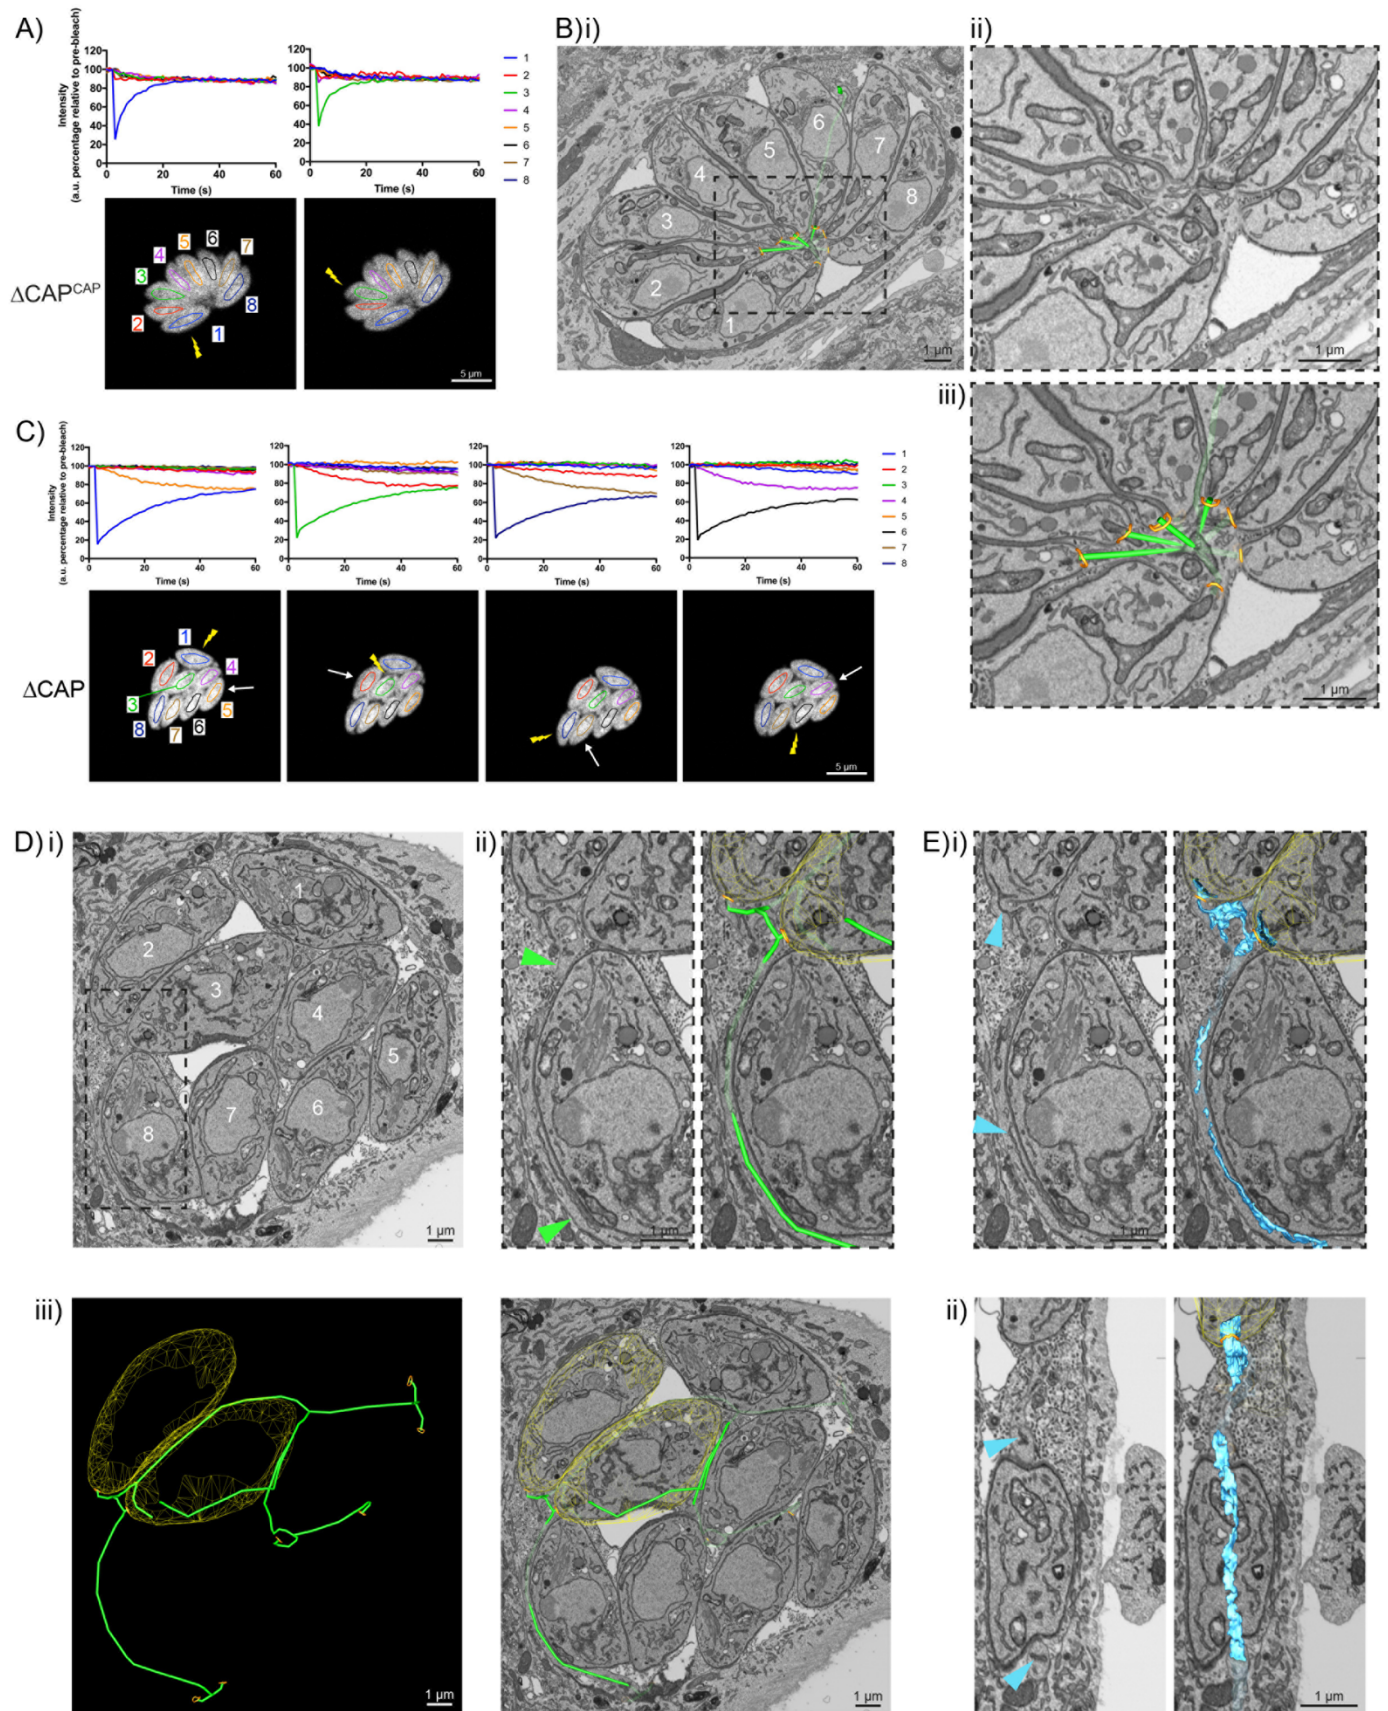

1708  
1709

1710 **Figure 8**

1711  
1712  
1713  
1714  
1715  
1716  
1717  
1718  
1719  
1720  
1721  
1722  
1723  
1724  
1725  
1726  
1727  
1728  
1729  
1730  
1731  
1732  
1733  
1734  
1735  
1736  
1737  
1738  
1739  
1740  
1741  
1742  
1743  
1744  
1745  
1746  
1747  
1748  
1749  
1750  
1751  
1752  
1753  
1754  
1755  
1756  
1757  
1758  
1759  
1760  
1761  
1762  
1763  
1764

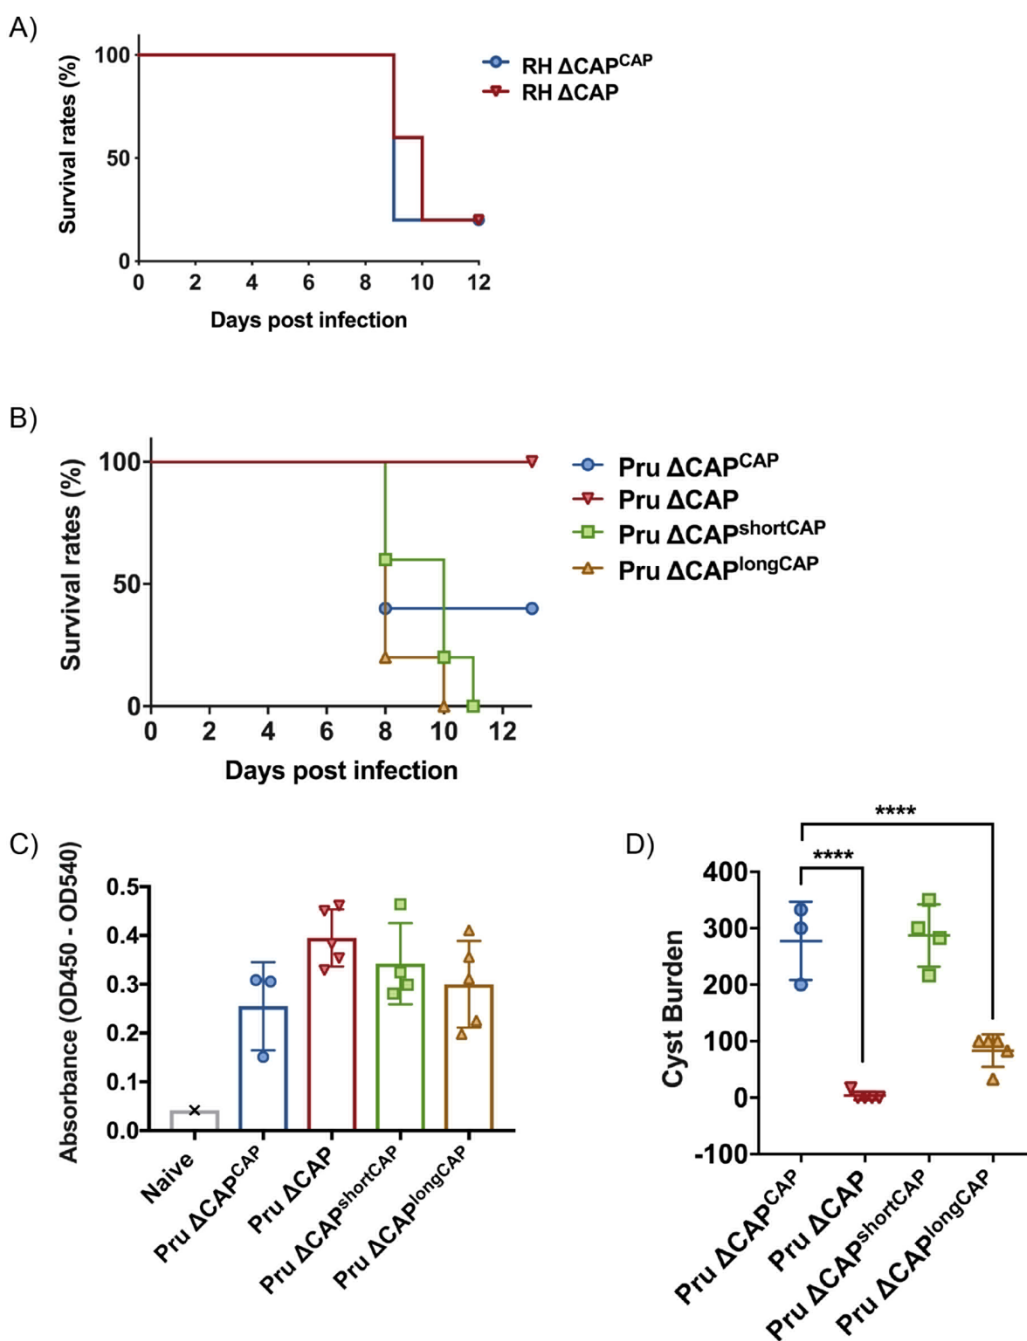

1765 **Supplementary Figure 1**  
1766

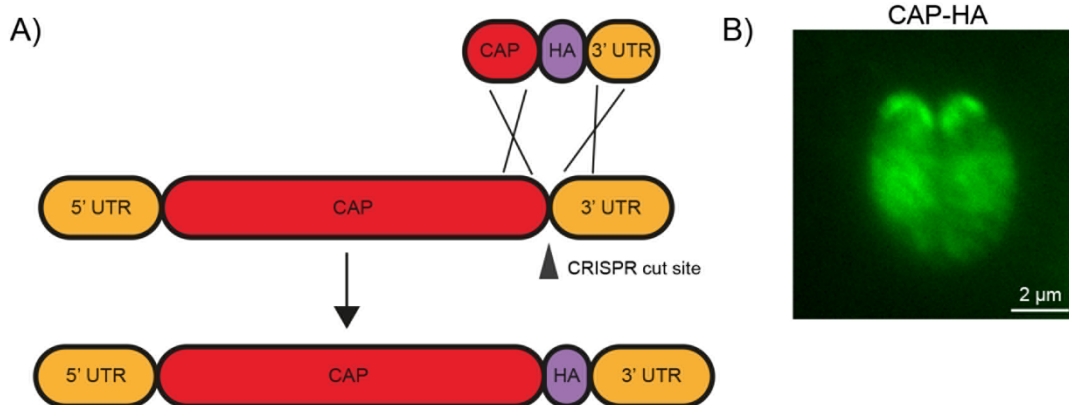

1767  
1768  
1769  
1770  
1771  
1772  
1773  
1774  
1775  
1776  
1777  
1778  
1779  
1780  
1781  
1782  
1783  
1784  
1785  
1786  
1787  
1788  
1789  
1790  
1791  
1792  
1793  
1794  
1795  
1796  
1797  
1798  
1799  
1800  
1801  
1802  
1803  
1804  
1805  
1806

1807 **Supplementary Figure 2**  
1808

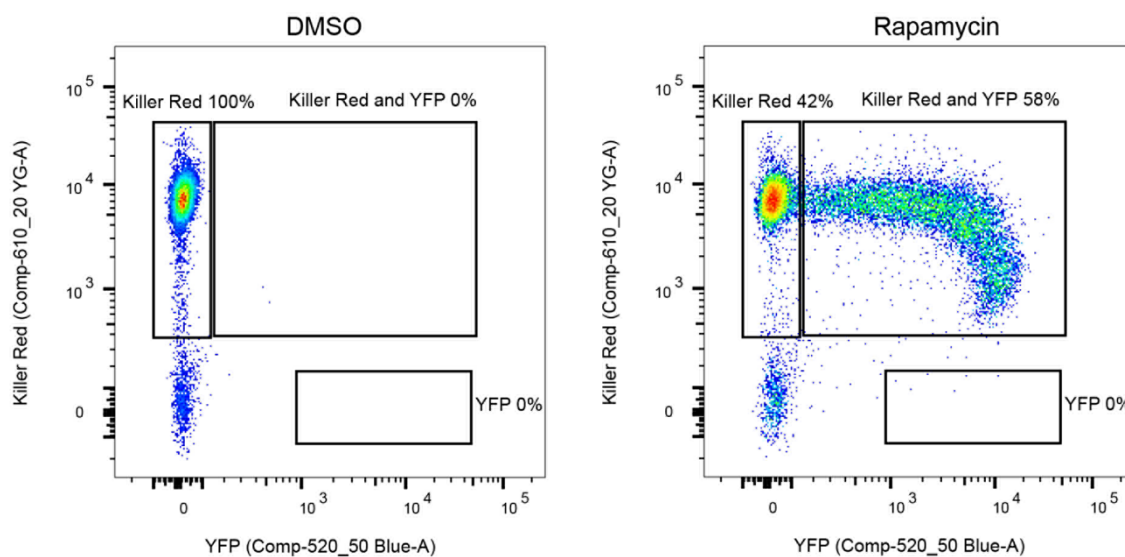

1809  
1810  
1811  
1812  
1813  
1814  
1815  
1816  
1817  
1818  
1819  
1820  
1821  
1822  
1823  
1824  
1825  
1826  
1827  
1828  
1829  
1830  
1831  
1832  
1833  
1834  
1835  
1836  
1837  
1838  
1839  
1840  
1841  
1842  
1843  
1844  
1845

1846 **Supplementary Figure 3**  
1847

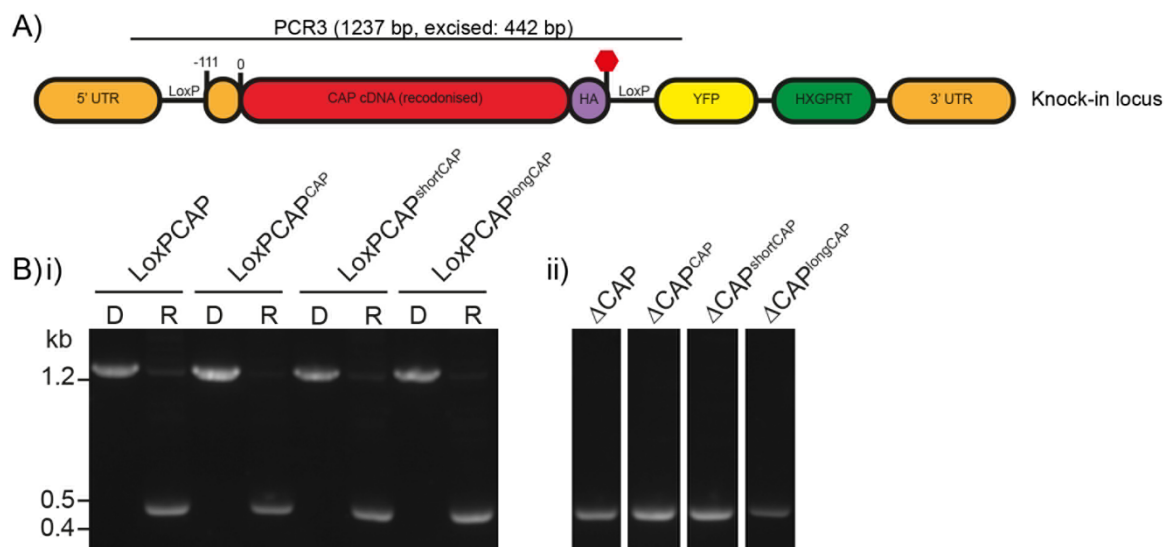

1848  
1849  
1850  
1851  
1852  
1853  
1854  
1855  
1856  
1857  
1858  
1859  
1860  
1861  
1862  
1863  
1864  
1865  
1866  
1867  
1868  
1869  
1870  
1871  
1872  
1873  
1874  
1875  
1876  
1877  
1878  
1879  
1880  
1881  
1882  
1883  
1884

1885 **Supplementary Figure 4**  
1886

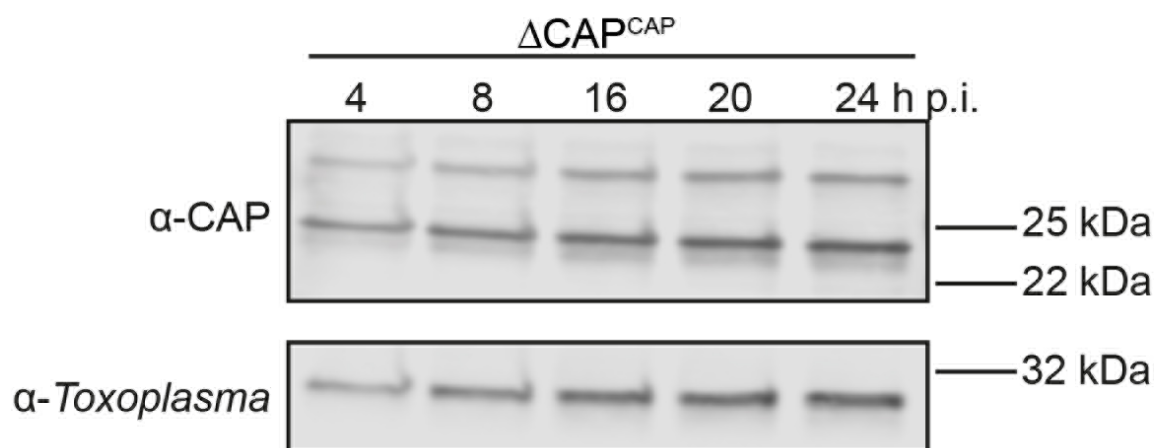

1887  
1888  
1889  
1890  
1891  
1892  
1893  
1894  
1895  
1896  
1897  
1898  
1899  
1900  
1901  
1902  
1903  
1904  
1905  
1906  
1907  
1908  
1909  
1910  
1911  
1912  
1913  
1914  
1915  
1916  
1917  
1918  
1919  
1920  
1921  
1922  
1923



1924 **Supplementary Figure 5**  
1925

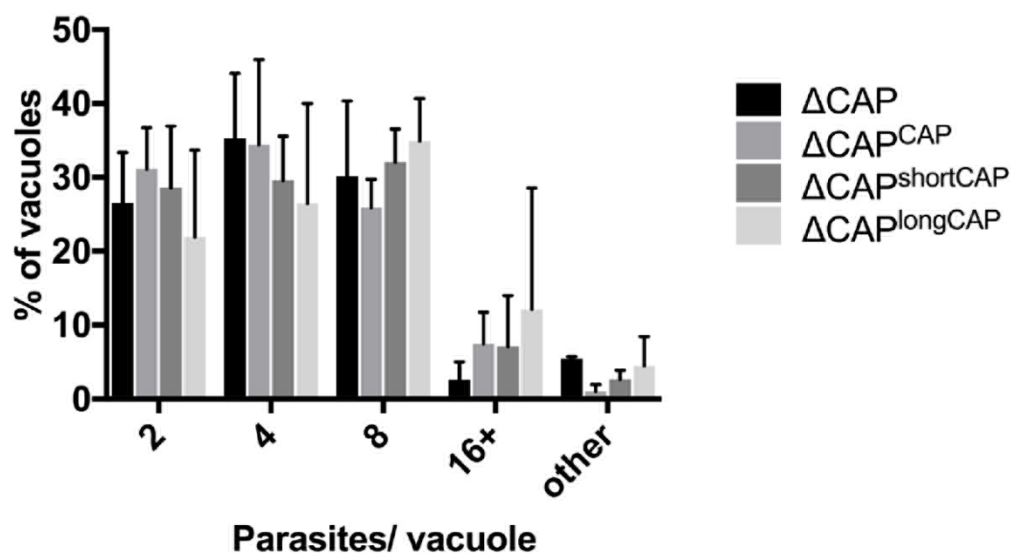

1926  
1927  
1928  
1929  
1930  
1931  
1932  
1933  
1934  
1935  
1936  
1937  
1938  
1939  
1940  
1941  
1942  
1943  
1944  
1945  
1946  
1947  
1948  
1949  
1950  
1951  
1952  
1953  
1954  
1955  
1956  
1957  
1958  
1959  
1960  
1961

1962 **Supplementary Figure 6**  
1963

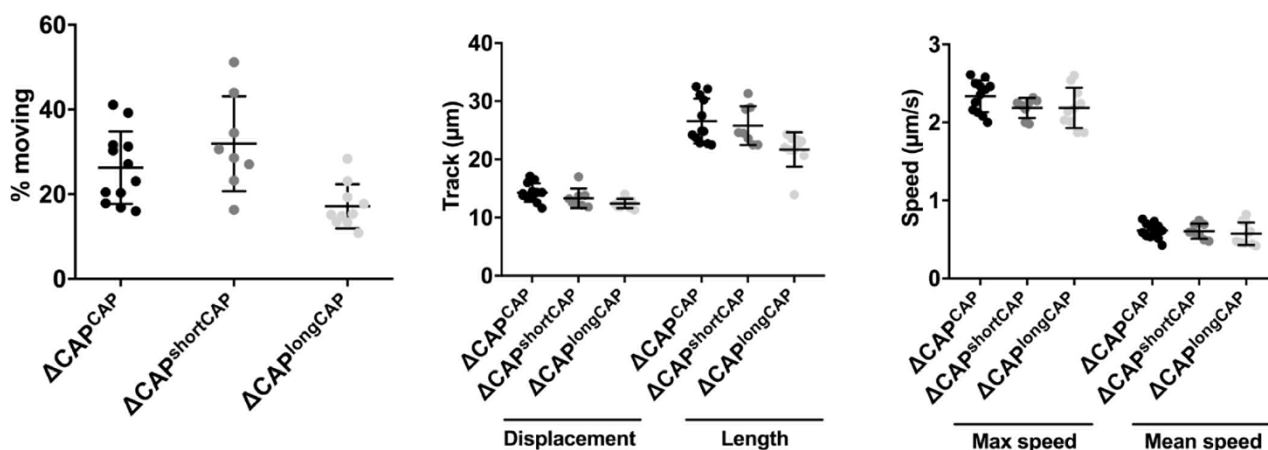

1964  
1965  
1966  
1967  
1968  
1969  
1970  
1971  
1972  
1973  
1974  
1975  
1976  
1977  
1978  
1979  
1980  
1981  
1982  
1983  
1984  
1985  
1986  
1987  
1988  
1989  
1990  
1991  
1992  
1993  
1994  
1995  
1996  
1997  
1998  
1999  
2000  
2001

2002 **Supplementary Figure 7**

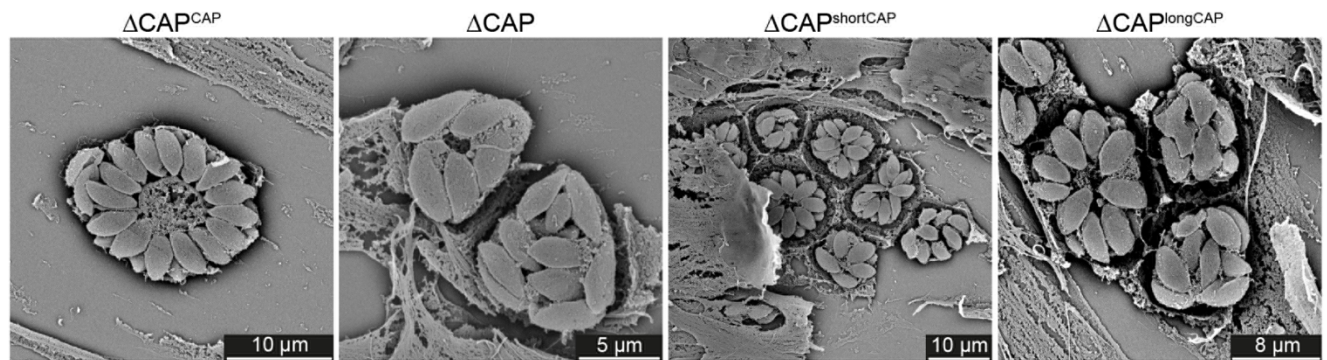

2003  
2004  
2005  
2006  
2007  
2008  
2009  
2010  
2011  
2012  
2013  
2014  
2015  
2016  
2017  
2018  
2019  
2020  
2021  
2022  
2023  
2024  
2025  
2026  
2027  
2028  
2029  
2030  
2031  
2032  
2033  
2034  
2035  
2036  
2037  
2038  
2039  
2040  
2041  
2042  
2043  
2044

2045 **Supplementary Figure 8**

2046

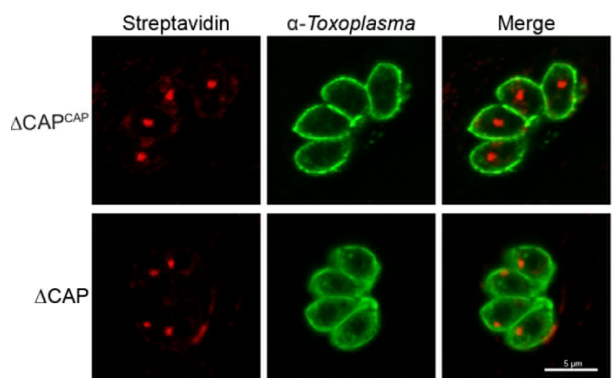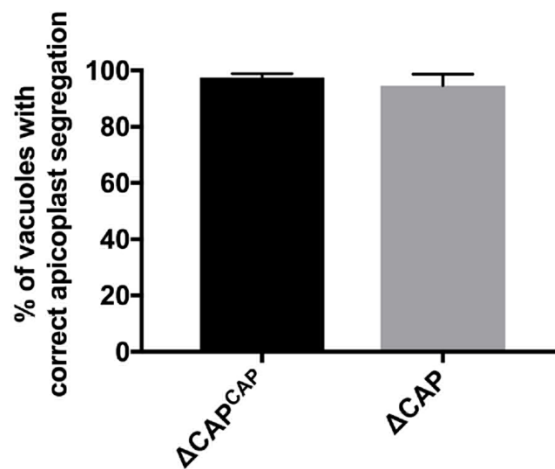

2047  
2048  
2049  
2050  
2051  
2052  
2053  
2054  
2055  
2056  
2057  
2058  
2059  
2060  
2061  
2062  
2063  
2064  
2065  
2066  
2067  
2068  
2069  
2070  
2071  
2072  
2073  
2074  
2075  
2076  
2077  
2078  
2079  
2080  
2081  
2082  
2083  
2084  
2085

2086 **Supplementary Figure 9**

2087

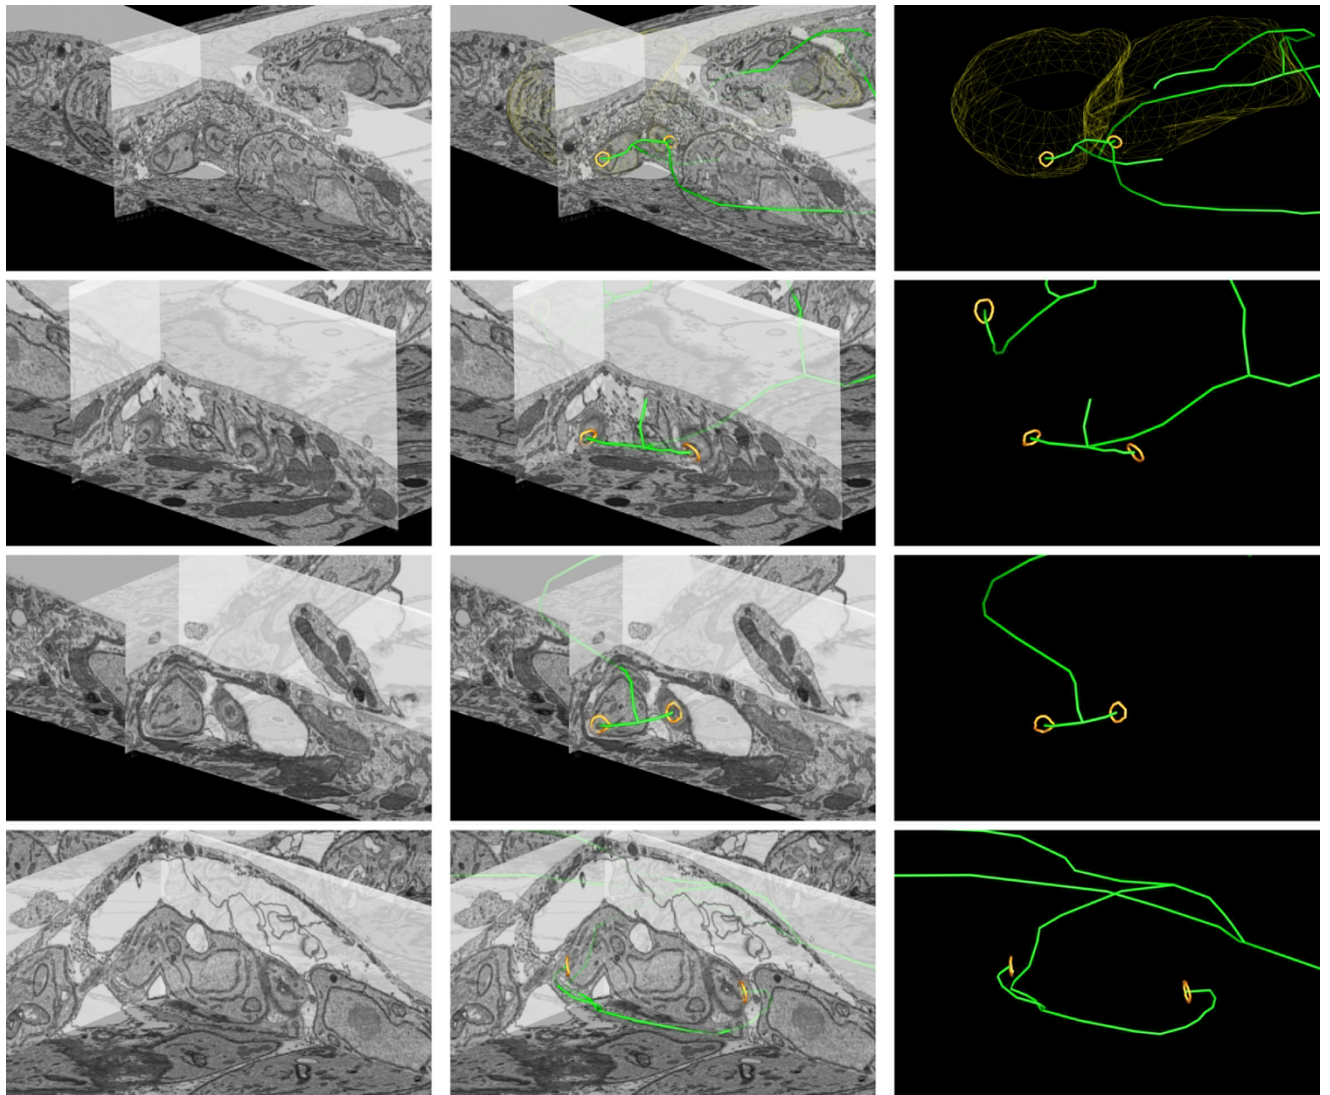

2088
